# Supplementary material for: Iron from coal combustion particles dissolves much faster than mineral dust under simulated atmospheric acid conditions
Source: Copernicus journal article supplement (doi:10.5194/acp-2021-748), 2021-09-30
Supplement: Supplementary file [file acp-2021-748-AC1-supplement.pdf]

The description and discussions of the model results in sections 2.5, 4.2, 5.3 have been updated.

The new model data are reported in Tables S4 and S5. Figures 8, 9, 11, and 12 of the revised manuscript show new model results. The model data available at <https://doi.org/10.25500/edata.bham.00000702> have been also updated.

## **Referee 1 – Dr Rachel Shelley**

General Response: We thank Dr Shelley for providing constructive comments. The comments have been addressed point by point below.

### **Comment 1: Soluble or labile would be better choices here**

Response: Page 1, lines 14-16 have been updated as follows:

“Mineral dust is the largest source of aerosol iron (Fe) to the offshore global ocean, but acidic processing of coal fly ash (CFA) in the atmosphere could be an important source of soluble aerosol Fe”.

### **Comment 2: Given in the main manuscript.**

Response: The reviewer comment has been implemented in the manuscript (Page 1, line 25).

### **Comment 3: Given in the main manuscript.**

Response: The reviewer comment has been implemented in the manuscript (Page 1, line 25).

### **Comment 4: Given in the main manuscript.**

Response: The reviewer comment has been implemented in the manuscript (Page 1, line 27).

### **Comment 5: Given in the main manuscript.**

Response: The reviewer comment has been implemented in the manuscript (Page 1, line 28).

### **Comment 6: Given in the main manuscript.**

Response: “Surface concentrations of dissolve Fe” (Page 1, line 31) has been replaced with Fe solubility.

### **Comment 7: replace with ‘...due to the initial rapid release of Fe at low pH.**

Response: Page 1, lines 30-34 have been updated as follows:

“The revised model showed a better agreement with observations of Fe solubility in aerosol particles over the Bay of Bengal, due to the initial rapid release of Fe and the suppression of the oxalate-promoted dissolution at low pH”.

### **Comment 8: Change to bio-accessible here and in subsequent cases**

Response: The term “Bioavailable Fe” has been replaced with “Bio-accessible Fe” throughout the manuscript.

**Comments 9-15: (9) Change to, ‘The Fe transported in the atmosphere...’. (10) Add an observational reference here to support this statement. (11) Change this to < 1% and add refs Sholkovitz et al., 2009; 2012. Schroth et al., 2009, isn’t the best ref here as they weren’t comparing multiple dust samples. (12) Change to, ‘...processes occurring during atmospheric transport’ as this would cover a wider range of mechanisms. It would also be worth noting that although Fe solubility is low in mineral dust close to source regions, the sheer volume of material deposited results in (relatively) high concentrations of soluble Fe. (13) Add metal smelting as a source. (14) Add ref. (15) Varies. I’m not clear what sources you mean here. Do you mean all sources or just the pyrogenic sources? You also need to make it clearer what the fractional solubility of oil and BB is higher than.**

Response: Page 2, lines 49-60 have been updated as follows:

“The Fe transported in the atmosphere is largely derived from lithogenic sources, which contribute around 95% of the total Fe in suspended particles (e.g., Shelley et al., 2018) and most studies so far have concentrated on atmospheric processing of mineral dust (e.g., Cwiertny et al., 2008; Fu et al., 2010; Ito and Shi, 2016; Shi et al., 2011a; Shi et al., 2015). Mineral dust has low Fe solubility (dissolved Fe/ total Fe) near the source regions, generally below 1% (e.g., Shi et al., 2011c; Sholkovitz et al., 2009; Sholkovitz et al., 2012), increasing somewhat as a result of processes occurring during atmospheric transport (e.g., Baker et al., 2021; Baker et al., 2020). Other sources of bio-accessible Fe to the ocean are from combustion sources such as biomass burning, coal combustion, oil combustion, and metal smelting (e.g., Ito et al., 2018; Rathod et al., 2020). Although these sources are only a small fraction of the total Fe in atmospheric particulates, the Fe solubility of pyrogenic sources can be 1–2 orders of magnitude higher than in mineral dust (Ito et al., 2021b and references therein), and thus can be important in promoting carbon uptake. However the Fe solubility of pyrogenic sources varies considerably depending on the particular sources with higher values observed for oil combustion and biomass burning than coal combustion sources (Ito et al., 2021b and references therein)”

**Comments 16-18: Given in the main manuscript.**

Response: The reviewer comments have been implemented in the manuscript (Page 2, lines 61, 65, and 70).

**Comment 19: Best to change spelling to sulfur throughout as this is the IUPAC convention**

Response: The reviewer comment has been implemented throughout the manuscript.

**Comment 20: Given in the main manuscript.**

Response: The reviewer comments have been implemented in the manuscript (Page 3, line 89).

**Comment 21: Given in the main manuscript.**

Response: The reviewer comments have been implemented in the manuscript (Page 3, line 101).

**Comment 22: As soil isn't mineral dust, you will need to justify its use, which is that you are using it as an analogue for a Saharan mineral dust end member in the same way that you are using the CFA as an end member for CFA dust in the atmosphere. Later in the text you sometimes refer to Libyan dust, sometimes Saharan dust and in the XANES spectral plot, as western Saharan dust. For consistency, and to avoid confusion, best to stick to one.**

Response: Libyan dust precursor is now specified throughout the manuscript.

In addition, Page 4, lines 136-139 have been updated as follows: "A soil sample from Libya (Soil 5, 32.29237N/22.30437E) was dry sieved to 63  $\mu\text{m}$  and used as an analogue for a Saharan mineral dust precursor to make a comparison between CFA and mineral dust".

**Comment 23: Have you done recovery experiments to investigate microwave digestion using HNO<sub>3</sub> only compared to a mixture of HNO<sub>3</sub> and HF. It is usually necessary to include some HF for full digestion of mineral dust samples. This might be less of an issue CFAs but could potentially have resulted in incomplete digestion of the Libyan soil and ATD.**

Response: For the analysis of the total Fe content, we only used the microwave digestion in concentrated HNO<sub>3</sub>. The recovery of Fe was around 89% which was assessed using a standard reference material for urban particulate matter (NIST SRM 1648A). We did not make a comparison with other extraction techniques, but we acknowledge that this technique may underestimate the total Fe in mineral dust, as crystalline aluminium silicate minerals may not be fully digested. Consequently, the Fe solubility for the Libyan dust sample could be overestimated and even lower than that observed for the CFA samples. Page 5, lines 187-189 have been updated as follows:

"The recovery of Fe assessed using a standard reference material for urban particulate matter (NIST SRM 1648A) was around 89%. Therefore, the total Fe in the Libyan dust precursor sample could be underestimated somewhat as crystalline aluminium silicate minerals may not be fully digested".

**Comment 24: This is useful information but more explanation is needed here. You haven't mentioned ATD before. Explain what it is and why you used it. Could you also include the relative proportions of each Fe mineral phase in ATD in the SI? This data is of interest as more people start to use ATD as an SRM.**

Response: The sequential extraction techniques were tested using the Arizona Test Dust (ATD, Power Technology, Inc.). The ATD was also used as reference sample to check the recovery of the extracted Fe. A summary of the results for the ATD was added to the supporting information (Table S2).

Page 5, lines 190-192 have been updated as follows:

"The sequential extraction techniques were tested using the Arizona Test Dust (ATD, Power Technology, Inc.). The RSD% obtained for each extract using the ATD was 3% for FeA, 11% for FeD, 12% for FeM (n=7) and 2% for the 179 total Fe (n=3). A summary of the results for the ATD is reported in Table S2".

**Comment 25: The first 2-3 h are the time scale most critical to in-cloud processing. Could you address the rationale for the 168 h leaching in a little more detail? You could do a quick calculation to determine the solubility of Fe at pH 2.1 compared to 2.7 which allow you to make the argument that it is a pH effect rather than a solute concentration effect. If you do the suggested calculation you will be also be able to comment on the rate order of the observed dissolution kinetics.**

Response: The leaching experiments were conducted up to 168 h to better capture the dissolution curve in the kinetic model but also considering the tropospheric lifetime of aerosol particles. This is now stated in the manuscript at Page 7, lines 232-233.

At pH 2.7, the Fe solubility of Krakow ash measured after 2-hour leaching in 0.005 M H<sub>2</sub>SO<sub>4</sub> - final pH 2.7 ( $9 \cdot 10^{-5}$  mol L<sup>-1</sup>) is lower than the equilibrium Fe solubility of highly reactive Fe species such as ferrihydrite ( $6 \cdot 10^{-4}$  mol L<sup>-1</sup> from Shi et al. (2011a)), but higher than the solubility of more refractory Fe-bearing phases such as nanogoethite ( $6 \cdot 10^{-6}$  mol L<sup>-1</sup> from Shi et al. (2011a)) and hematite ( $1.6 \cdot 10^{-8}$  mol L<sup>-1</sup> from Bonneville et al. (2009)). This suggest that the system has reached the equilibrium as sufficient Fe may be dissolved from the highly reactive Fe species to suppress the dissolution of less reactive Fe. Page 7, lines 236-237 have been updated as follows:

“In the case of Krakow ash, the dissolution plateau was reached after 2-hour leaching in 0.005 M H<sub>2</sub>SO<sub>4</sub> as sufficient Fe may be dissolved from the highly reactive Fe species to suppress the dissolution of less reactive Fe”.

**Comments 26-27: Given in the main manuscript.**

Response: The reviewer comments have been implemented in the manuscript (Page 8, lines 279, 285)

**Comments 28-30: (28) Clarify if this the Libyan soil. (29) Slightly confusing labelling as Western Sahara is a country. If you can't change the label on the spectral plot, can you address this in the caption? (30) I'm not seeing the double peaks for the Icelandic and Saharan dusts in the pre-edge region. Why do you think there are more similarities with the Icelandic dust? Also sourced from high temp processes or a coincidence? Move Fig s2 into main text – you could have a Fig 5a and b.**

Response: The reviewer comments 28-30 have been implemented in the manuscript. Former Figures 5 and S2 have been merged as Figure 5. Figure 5b shows the pre-edge region at higher resolution. The Icelandic dust sample MIR-45 has been replaced with the sample D3 (Baldo et al., 2020). The mineral dust sample from western Sahara is now labelled “WS dust” on the spectral plot. We compared CFA and Icelandic dust because both have high content of aluminium silicate glass. Icelandic dust has volcanic origin as the parent sediments originate from the glacial erosion of volcanic deposits such as hyaloclastite (deposits consisting in glass fragments formed by rapid cooling of magna on contact with

water or ice), and lava flows (Baldo et al., 2020). On the other hand, CFA is formed due to rapid cooling of particles transported in flue gases during coal combustion (e.g., Jones, 1995).

Page 8, lines 292-306 have been updated as follows:

“The XANES Fe K-edge spectra of the CFA samples have some common features with those of Icelandic dust but tend to differ from mineral dust sourced in Saharan dust source region. In the pre-edge region of the spectrum, Icelandic dust (sample D3 in Fig. 5a-b) showed a main peak at around 7114.4 eV and a second less intense peak at around 7112.7 eV, while a broad peak was observed at around 7131.9 eV in the edge region (Baldo et al., 2020). A mineral dust sample from western Sahara (WS dust in Fig. 5a-b) showed a distinct double peak in the pre-edge region at around 7113.9 and 7115.2 eV, and a main peak in the edge region at around 7133.3 eV (Baldo et al., 2020). The similarities between Icelandic ash and CFA could be because aluminium silicate glass is dominant in these samples (e.g., Baldo et al., 2020; Brown et al., 2011), while Fe-bearing phases in mineral dust from the Saharan region are primarily iron oxides minerals such as hematite and goethite, clay minerals and feldspars (e.g., Shi et al., 2011b)”.

**Comments 31: The model is struggling to capture the initial rapid dissolution relevant to in-cloud processing. Why do you think this is?**

Response: The laboratory measurements of the dissolution kinetics and Fe speciation were used to model the Fe solubility in the CFA samples. The dissolution of FeA as fast pool is insufficient to account for the initial rapid increase in Fe solubility, which indicate additional Fe was dissolved from more refractory Fe-bearing phases. Using FeM as intermediate pool improved the agreement between the model results and observations, but further work is needed to investigate the link between Fe solubility on Fe mineralogy. This is discussed in more details in section 5.1.

**Comments 32-34: Given in the main manuscript.**

Response: The reviewer comments have been implemented in the manuscript (Page 9, line 325 and Page 10, lines 361, 363)

**Comment 35: Are you saying that there is a question about the reliability of the field data from 29/12/08 or the whole transect? If the latter, this could be a problem. Have you looked at satellite AOD data for this date and the days either side to try to establish if this peak is likely to be reliable?**

Response: Unfortunately, it is hard to interpret the satellite images and AOD data available for this location during 27-30 December 2008. However, we have looked at total Fe concentrations on this date and the days before and after. The total Fe observed in PM<sub>10</sub> (430 ng m<sup>-3</sup>) on 29 December 2008 is lower than that measured on the day before (667 ng m<sup>-3</sup>) and the day after (773 ng m<sup>-3</sup>), showing a

negative peak, as opposed to the positive peak in PM<sub>2.5</sub> (Srinivas et al., 2012). Thus, the extreme value recorded only for PM<sub>2.5</sub> on this date may be an outlier.

Page 11, lines 390-395 have been updated as follows:

“On the other hand, the model could not reproduce the peak in total Fe concentration (1.8% of Fe content in PM<sub>2.5</sub> sample) reported around 29 December 2008. The total Fe observed in PM<sub>10</sub> (430 ng m<sup>-3</sup>) on 29 December 2008 is lower than that measured on the day before (667 ng m<sup>-3</sup>) and the day after (773 ng m<sup>-3</sup>), whereas that in PM<sub>2.5</sub> peaked on 29 December 2008 (Srinivas et al., 2012). Thus, the extreme value recorded only for PM<sub>2.5</sub> on this date may be an outlier”.

**Comment 36: I wonder how familiar people are with Taylor diagrams. There is a lot of information presented in Fig. 9 but it's not very accessible. I suggest putting this plot in the SI.**

Response: The Taylor diagram in former Figure 9 (current Figure S3) has been moved to the supporting information and replaced with former Figure S7.

**Comments 37-38: Given in the main manuscript.**

Response: The reviewer comments have been implemented in the manuscript (Page 12, lines 421, 429)

**Comments 39-40: (39) Fu et al used a different leach technique. They didn't include any oxalate. This different leach media will almost certainly impact dissolution kinetics and fractional solubility. In addition, you have already noted that the different CFAs in your study have different kinetics. I suggest changing this to 'The Fe in our CFA samples initially dissolved faster than those used by Fu et al. (2012). This could be due to differences in the Fe speciation of the CFA samples in the two studies and/or the different leach media used.' – or words to that effect. (40) In Chen et al's Fig. 4, it was 6- 25% at pH 2 – this was the leach closest (but not the same) to your one. It was 21-70% after three pH cycles which is a very different leaching scheme to your one. The more appropriate comparison is with the data they show in Fig. 4 BUT you must note that your study and those of Fu and Chen all use quite different leach solutions and durations as some of the variability will result from these different conditions.**

Response: This is a very fair comment. What we did was to compare specifically the dissolution kinetics of CFA at pH 2 (acid only) observed in this study with data from the literature. We have now made this point clearer. Other conditions (e.g., with oxalate) were also discussed throughout section 5.1. We agree with the reviewer that the dissolution behaviour of CFA may be affected by the kind of CFA samples and/or the leaching media used in the different studies. We also wanted to highlight that at the same experimental conditions the CFA dissolution kinetics can vary considerably depending on the CFA type. Both of these points are made clearer in the revised text.

Page 12, lines 428-443 have been updated as follows:

“Our results showed a strong pH dependence in low ionic strength conditions, with higher dissolution rates at lower pH. For example, reducing the solution pH from 2.7 to 2.1, the Fe solubility of Krakow ash in H<sub>2</sub>SO<sub>4</sub> only increased by a factor of 4 (Fig. 1a) over the duration of the experiments, while the Fe solubility of Aberthaw and Shandong ash increased by 9-10 times from pH 2.9 to pH 2.2 (Figs. 1b-c). This enhancement is higher than that observed in studies conducted on mineral dust samples, which showed that one pH unit can lead to 3-4 times difference in dissolution rates (Ito and Shi, 2016; Shi et al., 2011a). Furthermore, Chen et al. (2012) reported that the Fe solubility of the certified CFA 2689 only increased by 10% from pH 2 to pH 1, after 50 hours of dissolution in acidic media. The Fe solubility of CFA (PM<sub>10</sub> fractions) after 6 hours at pH 2 was 6%-10% for Aberthaw and Shandong ash respectively, and 28% for Krakow ash (Fig. 1). The Fe in our CFA samples initially dissolved faster than those used by Fu et al. (2012), who reported 2.9%-4.2% Fe solubility in bulk CFA from three coal-fired power plants in China after 12-hour leaching at pH 2. These results suggest that there are considerable variabilities in the pH dependent dissolution of Fe in CFA. This could be due to differences in the Fe speciation between CFA samples and/or the different leaching media used“.

**Comment 41: Note that this is in contrast to Chen et al’s findings**

Response: This was mentioned at line 456-457, Page 12:

“Cwiertny et al. (2008) reported that at pH 1-2 the high ionic strength generated by NaCl up to 1 M did not influence Fe dissolution of mineral dust particles”.

**Comments 42-43: Given in the main manuscript.**

Response: The reviewer comments have been implemented in the manuscript (Page 12, line 449 and Page 14, line 503).

**Comments 44-45: (44) this is a contradiction – estimate with more accuracy perhaps? (45) ‘More’ More work to determine the mineralogy of Fe in ‘natural’ and processed CFAs, in combination with solubility experiments, in order to investigate the links between Fe solubility and Fe speciation/mineralogy is needed**

Response: Page 14, lines 523-527 have been updated as follows:

“In order to investigate the links between Fe solubility and Fe speciation/mineralogy, more work is needed to determine the Fe mineralogy in CFA samples at emission and after atmospheric processing, in combination with solubility experiments”.

**Comment 46: I really think that the plots of your data that are currently in the SI should be moved into the main manuscript, as you refer to them quite extensively and it is much easier to follow if you don’t have to keep flicking between the SI and manuscript. These plots could be consolidated, e.g., S8 and S9 could become one plot. Similarly, S3-5 could also become one plot. The tables should stay in the SI.**

Response: As suggested former Figures S3, S4 and S5 have been merged as Figure 7 and former Figures S8 and S9 have been combined in Figure 10.

**Comments 47-48: (47) Libyan rather than Libya. Change Saharan to Libyan to save confusion. (48) I would assume that most people don't know where Tibesti is. I certainly didn't! State that the sample is also from a Saharan dust source region.**

Response: Page 15, lines 555-564 have been updated as follows:

“High ionic strength also impacted the dissolution rates of the Libyan dust precursor sample at low pH (Fig. S4). At around pH 2 conditions, the proton-promoted Fe dissolution of Libyan dust was enhanced by ~40% after the addition of  $(\text{NH}_4)_2\text{SO}_4$ . At around pH 2 and with 0.01 M  $\text{H}_2\text{C}_2\text{O}_4$ , the Fe solubility of Libyan dust decreased by ~30% in the presence of  $(\text{NH}_4)_2\text{SO}_4$ . Overall, the Fe solubility of Libyan dust was lower compared to that observed in the CFA samples. After 168 hour-leaching at pH 2.1 with 1 M  $(\text{NH}_4)_2\text{SO}_4$ , the Fe solubility of Libyan dust was 7.2% (Fig. S4), which was from around 3 to 7 times lower compared to that of the CFA samples (Fig. 1). At around pH 2 conditions in the presence of oxalate and high  $(\text{NH}_4)_2\text{SO}_4$  concentration, the Fe solubility of Libyan dust rose to ~13.6% (Fig. S4), which is still 4 times lower than that of Krakow ash and around 1.5 lower than Aberthaw and Shandong ash (Fig. 2). The Fe solubilities of the Libyan dust observed in this study are comparable with those of the Tibesti dust (Tibesti Mountains, Libya, 25.583333N/16.516667E) in Ito and Shi (2016) at similar experimental conditions”.

**Comment 49: Can you quantify this? Yes, you have more of a range of concentrations but many (most?) of the model output data looks to be different than the observation.**

Response: Former Figure 10 has been moved to the supporting information (current Figure S5) and updated with the aerosol Fe solubility data.

Page 15, lines 583-586 have been updated as follows:

“In Fig. S5, the model estimates of aerosol Fe solubility over the Bay of Bengal considerably improved in Test 1 (RMSE 11) compared to Test 0 (RMSE 21), but more work is needed to improve size-resolved Fe emission, transport, and deposition”.

**Comments 50-54: Given in the main manuscript.**

Response: The reviewer comments have been implemented in the manuscript (Page, 16 lines 587, 591, Page 18 lines 627, 628, Page 19 line 630).

**Comments 55-56: (55) Add amorphous Fe to FeA and goethite/hematite Fe to FeD, and other Fe (including Fe in alumino-silicates). (56) Given in the main manuscript.**

Response: Former Figures 5 and S2 have been merged as Figure 5 in the revised manuscript. Figure 5b shows the pre-edge region at higher resolution. The Icelandic dust sample MIR-45 has been replaced with the sample D3 (Baldo et al., 2020).



The caption of Figure 5 has been updated as follows:

“Figure 1: Fe speciation in CFA and mineral dust samples. a-b) Fe K-edge XANES spectra of Krakow ash, Aberthaw ash, magnetite, hematite, and illite standards, mineral dust from the Dyngjúsundur dust hotspot in Iceland - D3 (Baldo et al., 2020), and mineral dust from western Sahara - WS dust (Shi et al., 2011b). c) Percentages of ascorbate Fe (amorphous Fe, FeA), dithionite Fe (goethite/hematite, FeD), magnetite Fe (FeM), and other Fe (including Fe in aluminosilicates) to the total Fe (FeT) in the CFA samples and Libyan dust precursor. The FeT (as %wt.) is given below each sample column. The data uncertainty was estimated using the error propagation formula: 4% for FeA/FeT, 11% for FeD/FeT, 12% for FeM/FeT, and 2 % for FeT.”

**Comments 57: Part of this reference is missing.**

Response: This has been corrected:

Pye, H. O. T., Nenes, A., Alexander, B., Ault, A. P., Barth, M. C., Clegg, S. L., Collett Jr, J. L., Fahey, K. M., Hennigan, C. J., Herrmann, H., Kanakidou, M., Kelly, J. T., Ku, I. T., McNeill, V. F., Riemer, N., Schaefer, T., Shi, G., Tilgner, A., Walker, J. T., Wang, T., Weber, R., Xing, J., Zaveri, R. A., and Zuend, A.: The acidity of atmospheric particles and clouds, *Atmos. Chem. Phys.*, 20, 4809-4888, doi: 10.5194/acp-20-4809-2020, 2020.

## Referee 2 – Morgane Perron

General Response: We thank Dr Perron for the valuable and comprehensive comments. The comments have been addressed point by point below.

**Comment 1: This hasn't been shown (to this extent) by any study. In order to have such impact CFA emissions would have to be both highly soluble (they are) and of very large magnitude (not shown to date). Maybe just pace down the sentence by choosing another word.**

Response: Page 1, lines 14-16 have been updated as follows:

“Mineral dust is the largest source of aerosol iron (Fe) to the offshore global ocean, but acidic processing of coal fly ash (CFA) in the atmosphere could be an important source of soluble aerosol Fe”.

**Comment 2: Associated figure says “other” I cannot recall any data showing the remaining fraction is aluminosilicate. If no proof maybe correct to “remaining 50%-87 % of Fe was thought to be associated with ...” or “remaining 50%-87 % of Fe may be comprised in ...”**

Response: Page 1, lines 19-20 has been updated as follows:

“The remaining 50%-87 % of Fe was associated with other Fe-bearing phases, possibly aluminosilicates”.

**Comment 3-4: (3) Either because of the pH or because of differences in the samples...? I'd delete this sentence this is not the main finding (4) No word on oxalate addition?**

Response: Page 1, lines 21-24 have been updated as follows:

“The oxalate effect on the Fe dissolution rates at pH 2 varied considerably depending on the samples, from no impact for Shandong ash to doubled dissolution for Krakow ash”.

**Comment 5: Given in the main manuscript.**

Response: Page 1, lines 27-28 have been updated as follows:

“Overall, Fe in CFA dissolved up to 7 times faster than in a Saharan dust precursor sample at pH 2”.

**Comment 6: I do not think the model focuses on surface Fe dissolution only. Likely it accounts for Fe dissolution from one aerosol as a whole (although it is thought that surface Fe will dissolve first).**

Response: We did not mean the particulate surface by surface, but the mass concentration in the air over the surface ocean. We corrected it.

Page 1, lines 30-34 have been updated as follows:

“The revised model showed a better agreement with observations of Fe solubility in aerosol particles over the Bay of Bengal, due to the initial rapid release of Fe and the suppression of the oxalate-promoted dissolution at low pH”

Page 10, lines 373-379 have been updated as follows:

“Observations of total Fe concentration and Fe solubility in PM<sub>2.5</sub> along the cruise tracks over the Bay of Bengal for the period extending from 27 December 2008 to 26 January 2009 (Bikkina et al., 2020) were compared with temporally and regionally averaged data from model estimates. The daily averages of model results were calculated from hourly mass concentrations in the air over the surface ocean along the cruise tracks.”

**Comment 7: Community now tries to use “bioaccessible” Fe as the genuine bioavailability is still to prove.**

Response: The term “Bioavailable Fe” has been replaced with “Bio-accessible Fe” throughout the manuscript.

**Comment 8: Given in the main manuscript.**

Response: The reviewer comment has been implemented in the manuscript (Page 2, line 50).

**Comments 9-10: (9) I would say <1% is more accurate according to published literature. I’d suggest citing Sholkovitz et al 2012 and Sholkovitz et al 2009. (10) Reference needed.**

Response: The reviewer comments have been implemented in the manuscript and the references updated (Page 2, lines 53 and 58).

**Comment 11: Given in the main manuscript.**

Response: The Fe solubility from laboratory measurements on pyrogenic sources is reported in Table 2 of Ito et al. (2021b).

**Comments 12-14: Given in the main manuscript.**

Response: The reviewer comments have been implemented in the manuscript.

Page 2, lines 61-64 have been updated as follows:

“Wang et al. (2015) estimated that coal combustion emitted around  $\sim 0.9 \text{ Tg yr}^{-1}$  of Fe into the atmosphere (on average for 1960–2007), contributing up to  $\sim 86\%$  of the total anthropogenic Fe emissions. A more recent study, which has included metal smelting as an atmospheric Fe source, estimated that coal combustion emitted  $\sim 0.7 \text{ Tg yr}^{-1}$  of Fe for the year 2010, contributing around 34% of the total anthropogenic Fe atmospheric loading (Rathod et al., 2020)”.

**Comment 15: Given in the main manuscript.**

Response: The reviewer comment has been implemented in the manuscript (Page 2, line 70).

**Comment 16: Given in the main manuscript.**

Response: Page 3, lines 78-79 have been updated as follows:

“As a result, a thin layer of water with high acidity, low pH and high ionic strength is formed around the particles (Meskhidze et al., 2003; Spokes and Jickells, 1995; Zhu et al., 1992)”.

**Comment 17: Given in the main manuscript.**

Response: We are referring to aged aerosols including aged CFA particles. The reviewer comment has been implemented in the manuscript (Page 3, line 82).

**Comment 18: Oxalic acid? Maybe spell out the name when first encountered?**

Response: Please, note that the name and formula of oxalic acid are given at line 77, Page 3.

**Comment 19: Given in the main manuscript.**

Response: The reviewer comment has been implemented in the manuscript (Page 3, lines 88-89).

**Comment 20: Given in the main manuscript.**

Response: The reviewer comment has been implemented in the manuscript (Page 3, line 96).

**Comment 21: Given in the main manuscript.**

Response: The reviewer comment has been implemented in the manuscript (Page 3, line 101).

**Comment 22: called ‘CFA’ up to then.**

Response: The reviewer comment has been implemented throughout the manuscript.

**Comment 23: Is the term ‘phase’ commonly used to refer to the mineralogy of the particles holding Fe?**

Response: the term Fe phase has been replaced with Fe-bearing phase throughout the manuscript.

**Comment 24: I would pace that down. ‘confirming the existence of different Fe-bearing mineral ‘phases’ within a single CFA sample.**

Response: Page 4, lines 115-118 have been updated as follows:

“Previous studies showed that CFA dissolves much faster during the first 1-2 hours than subsequently (Borgatta et al., 2016; Chen et al., 2012; Chen and Grassian, 2013; Fu et al., 2012; Kim et al., 2020), confirming the existence of multiple Fe-bearing phases within a single CFA sample with different dissolution behaviour”.

**Comments 25-26: Given in the main manuscript.**

Response: Page 4, lines 119-120 have been updated as follows:

“In this study, laboratory experiments were conducted to determine the dissolution kinetics of coal combustion emission products (i.e., CFA)”

**Comments 27-28: (27) I am wondering about the use of the word “dust” sometimes in the manuscript. “Dust” would refer to a lithogenic mineral source (wind-blown soil). Maybe dust here would rather be changed to “aerosol fractions” which is the generic term for ‘particulates suspended in the air’ (28) Change to “aerosols”.**

Response: The reviewer comment has been implemented throughout the manuscript. The term dust is now used specifically for lithogenic sources.

**Comments 29 (see also comment 23 Referee 1): No HF used for digestion? Did you check the recovery, especially for the dust material (Libya dust and ATD)?**

Response: For the analysis of the total Fe content, we only used microwave digestion in concentrated HNO<sub>3</sub>. The recovery of Fe was around 89% which was assessed using a standard reference material for urban particulate matter (NIST SRM 1648A). We did not make a comparison with other extraction techniques, but we acknowledge that this technique may underestimate the total Fe in mineral dust, as crystalline aluminium silicate minerals may not be fully digested. Consequently, the Fe solubility for the Libyan dust sample could be overestimated and even lower than that observed for the CFA samples. Page 5, lines 187-189 have been updated as follows:

“The recovery of Fe assessed using a standard reference material for urban particulate matter (NIST SRM 1648A) was around 89%. Therefore, the total Fe in the Libyan dust precursor sample could be underestimated somewhat as crystalline aluminium silicate minerals may not be fully digested”.

**Comment 30 (see also comment 24 Referee 1): Given in the main manuscript.**

Response: The sequential extraction techniques were tested using the Arizona Test Dust (ATD, Power Technology, Inc.). The ATD was also used as reference sample to check the recovery of the extracted Fe. A summary of the results for the ATD was added to the supporting information (Table S2).

Data are reported as average and standard deviation of n replicates.

Page 5, lines 190-192 have been updated as follows:

“The sequential extraction techniques were tested using the Arizona Test Dust (ATD, Power Technology, Inc.). The RSD% obtained for each extract using the ATD was 3% for FeA, 11% for FeD, 12% for FeM (n=7) and 2% for the 179 total Fe (n=3). A summary of the results for the ATD is reported in Table S2”.

**Comment 31: May I suggest a summary table in the manuscript reporting each pH, H<sub>2</sub>SO<sub>4</sub> concentration, addition of H<sub>2</sub>C<sub>2</sub>O<sub>4</sub> and NH<sub>4</sub>SO<sub>4</sub> would make the reading much easier.**

Response: Table S1 reports the concentrations of H<sub>2</sub>SO<sub>4</sub>, H<sub>2</sub>C<sub>2</sub>O<sub>4</sub> and (NH<sub>4</sub>)<sub>2</sub>SO<sub>4</sub> in the experiment solutions, the original and final pH from model estimates (including H<sup>+</sup> concentrations and activities), and the pH measurements for the solution with low ionic strength. The concentrations of H<sub>2</sub>SO<sub>4</sub>, H<sub>2</sub>C<sub>2</sub>O<sub>4</sub> and (NH<sub>4</sub>)<sub>2</sub>SO<sub>4</sub> in the experiment solutions and the final pH from model estimates are also reported in the legends of all figures.

**Comment 32: On Fig 4 it looks like the addition of (NH<sub>4</sub>)<sub>2</sub>SO<sub>4</sub> does slightly (yet noticeably) diminish the Fe dissolution. Or is that another factor coming into play?**

Response: This was discussed in section 5.1, Page 13, lines 494-499:

“We speculate that the high concentration of sulfate ions is likely to be responsible for inhibiting the oxalate-promoted dissolution by reducing oxalate adsorption on the particle surface. At pH 1 in the presence of oxalate, increasing the concentration of (NH<sub>4</sub>)<sub>2</sub>SO<sub>4</sub> from 0.5 M to 1.5 M did not affect the Fe dissolution behaviour of the CFA samples (Fig. 4). As previously discussed, the adsorption of sulfate ions on the particle surface may inhibit oxalate-promoted dissolution. However, once the saturation coverage is reached, increasing the concentration of anions has no further effect on the dissolution rate (Cornell et al., 1976)“.

**Comment 33: Given in the main manuscript.**

Response: Libyan dust precursor is now specified throughout the manuscript.

**Comments 34-38 (see also comments 28-30 Referee 1): (34) Please develop slightly the reasoning here. (35) This is a funny parallel between CFA and dust, why would similarities be expected? Is that in order to better understand the composition (mineralogy) of the CFA? Is the exact composition of the Icelandic dust known? Is it dust or aerosols collected at a random location in**

**Iceland? Maybe a word to understand why the parallel between CFA and dust is made would help. (36) Libya dust? (37) Libya dust? Please keep wording consistent (38) I cannot see the double peak in the pre-edge region though I do not have a trained eye on this kind of graph. Maybe it isn't that distinct?**

Response: The chemical and mineralogical composition of Icelandic dust PM<sub>10</sub> fractions from 5 major dust hotspots in Iceland is reported in Baldo et al. (2020). We decided to make a comparison between Icelandic dust and CFA because the dominant component in Icelandic dust is aluminium silicate glass which is also a primary component of CFA (e.g., Brown et al., 2011). Icelandic dust has volcanic origin as the parent sediments originate from the glacial erosion of volcanic deposits such as hyaloclastite (deposits consisting in glass fragments formed by rapid cooling of magma on contact with water or ice), and lava flows (Baldo et al., 2020). On the other hand, CFA is formed due to rapid cooling of particles transported in flue gases during coal combustion (e.g., Jones, 1995),

Former Figures 5 and S2 have been now merged as Figure 5. Figure 5b shows the pre-edge region at higher resolution, increasing the resolution the double peak should be more visible. The Icelandic dust sample MIR-45 has been replaced with the sample D3 (Baldo et al., 2020).

Page 8, lines 292-306 have been updated as follows:

“The XANES Fe K-edge spectra of the CFA samples have some common features with those of Icelandic dust but tend to differ from mineral dust sourced in the Saharan dust source region. In the pre-edge region of the spectrum, Icelandic dust (sample D3 in Fig. 5a-b) showed a main peak at around 7114.4 eV and a second less intense peak at around 7112.7 eV, while a broad peak was observed at around 7131.9 eV in the edge region (Baldo et al., 2020). A mineral dust sample from western Sahara (WS in Fig. 5a-b) showed a distinct double peak in the pre-edge region at around 7113.9 and 7115.2 eV, and a main peak in the edge region at around 7133.3 eV (Baldo et al., 2020). The similarities between Icelandic ash and CFA could be because aluminium silicate glass is dominant in these samples (e.g., Baldo et al., 2020; Brown et al., 2011), while Fe-bearing phases in mineral dust from the Saharan region are primarily iron oxides minerals such as hematite and goethite, clay minerals and feldspars (e.g., Shi et al., 2011b)”.

**Comment 39 (see also comment 31 Referee 1): In Fig 6a,c,d , the model seems to miss out on the rapid increase in Fe solubility (as if the solubility of Fe in the model had a threshold up to 24h-time, the latter which seem bias the model outcome). On the contrary the subsequent Fe dissolution (after 24h) seem exaggerated in the model compared to the slow increase in the experimental result. A word on this?**

Response: The laboratory measurements of the dissolution kinetics and Fe speciation were used to model the Fe solubility in the CFA samples. The dissolution of FeA as fast pool is insufficient to account for the initial rapid increase in Fe solubility, which indicate additional Fe was dissolved from more refractory Fe-bearing phases. Using FeM as intermediate pool improved the agreement between the

model results and observations, but further work is needed to investigate the link between Fe solubility on Fe mineralogy. This was discussed in more detail in section 5.1, Page 14, lines 500-527.

**Comment 40: Given in the main manuscript.**

Response: The reviewer comment has been implemented in the manuscript (Page 9, line 325).

**Comment 41: Would a table help better understanding the different model test-runs?**

Response: Table S4 with the modelled mass concentrations of total Fe and Table S5 with the modelled aerosol Fe solubility have been added to the supporting information. Please note that the Fe speciation, the measurements of the Fe dissolution kinetics, and the results of the IMPACT model for each sensitivity simulation (Test 0-3) can be downloaded at:

<https://doi.org/10.25500/edata.bham.00000702>.

**Comments 42-43: Given in the main manuscript.**

Response: The reviewer comments have been implemented in the manuscript (Page 10 lines 363 and 370).

**Comments 44-46: (44) do you mean total surface aerosol Fe? Vs surface dissolved Fe? The term aerosol Fe is confusing as dissolved Fe also refers to Fe which is part of aerosol particles. (45) How did measurements differentiate surface aerosol Fe to total aerosol Fe and surface dissolved aerosol Fe to total dissolvable aerosol Fe? Are all the measurements really specific to the surface of aerosols or is dissolved Fe only assumed to originate from the surface of aerosol (what is the aerosol Fe component then)? Maybe better wording for each measurement is required for enhanced clarity. (46) Total Fe in aerosols I assume?**

Response: The terms “aerosol Fe” and “aerosol dissolved Fe” have been replaced throughout the manuscript with “mass concentration of total Fe” and “mass concentration of dissolved Fe”, respectively.

Page 10, lines 373-385 have been updated as follows:

“Observations of total Fe concentration and Fe solubility in PM<sub>2.5</sub> along the cruise tracks over the Bay of Bengal for the period extending from 27 December 2008 to 26 January 2009 (Bikkina et al., 2020) were compared with temporally and regionally averaged data from model estimates. The daily average of model results were calculated from hourly mass concentrations in the air over the surface ocean along the cruise tracks. The concentration of total Fe observed over the Bay of Bengal varies from  $145 \pm 144$  ng m<sup>-3</sup> over the North Bay of Bengal (27 December 2008 - 10 January 2009) to  $55 \pm 23$  ng m<sup>-3</sup> over the South Bay of Bengal (11-26 January 2009) (Bikkina et al., 2020). In Fig. 8, the modelled concentrations of total Fe exhibit a similar variability to that of measurements with relatively higher values over the North Bay of Bengal ( $59 \pm 29$  ng m<sup>-3</sup> in different sensitivity simulations) compared to

the South Bay of Bengal ( $20 \pm 12 \text{ ng m}^{-3}$  in different sensitivity simulations). However, the modelled concentrations of total Fe were underestimated by a factor of  $2.9 \pm 1.5$ .”

Please also note that in section 4.2 the description of the model outputs has been updated with the new model results.

**Comment 47: May I suggest that biomass burning is represented in orange or another colour as we cannot see it well as it currently is. Also, maybe instead of / in addition to plotting date as x axis, the location could be stated/ indicated (from the Northern Bay of Bengal to the South).**

Response: Former Figure 7 (current Figure 8) has been modified following the suggestion of the reviewer. In the caption, we added the reference time intervals for the measurements over the North and South Bay of Bengal.

**Comment 48 (see also comment 35 Referee 1): This peak is quite large for reflecting measurement uncertainty, isn't it? Have you checked whether this point may be the result of a specific weather event (fire emission for example, such a peak may be visible from satellite observation) or may originate from a single sample contamination (in this case it should be discarded)**

Response: Unfortunately, it is hard to interpret the satellite images and AOD data available for this location during 27-30 December 2008. However, we have looked at total Fe concentrations on this date and the days before and after. The total Fe observed in  $\text{PM}_{10}$  ( $430 \text{ ng m}^{-3}$ ) on 29 December 2008 is lower than that measured on the day before ( $667 \text{ ng m}^{-3}$ ) and the day after ( $773 \text{ ng m}^{-3}$ ), showing a negative peak, as opposed to the positive peak in  $\text{PM}_{2.5}$  (Srinivas et al., 2012). Thus, the extreme value recorded only for  $\text{PM}_{2.5}$  on this date may be an outlier. Since we focus on Fe solubility in the revised paper, discarding this data point does not change the results significantly (see Figure R1).

Page 11, lines 390-395 have been updated as follows:

“On the other hand, the model could not reproduce the peak in total Fe concentration (1.8% of Fe content in  $\text{PM}_{2.5}$  sample) reported around 29 December 2008. The total Fe observed in  $\text{PM}_{10}$  ( $430 \text{ ng m}^{-3}$ ) on 29 December 2008 is lower than that measured on the day before ( $667 \text{ ng m}^{-3}$ ) and the day after ( $773 \text{ ng m}^{-3}$ ), whereas that in  $\text{PM}_{2.5}$  peaked on 29 December 2008 (Srinivas et al., 2012). Thus, the extreme value recorded only for  $\text{PM}_{2.5}$  on this date may be an outlier”.



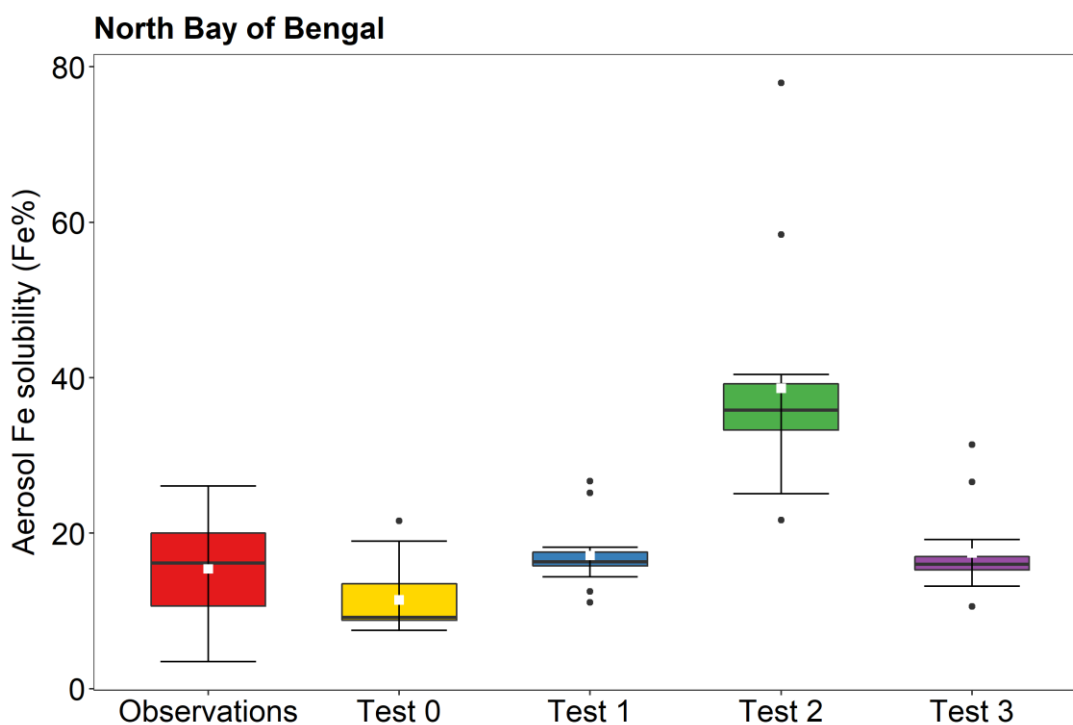

Figure R1: Aerosol Fe solubility over the North Bay of Bengal obtained discarding data on 29 December 2008.

**Comment 49:** dFe concentrations in aerosols seem to fluctuate a lot throughout the sampling transect. I would personally use median value rather than average for aerosols to avoid being biased by very low/high data points. The lowest dissolved Fe data are towards the right-hand side of the graph which I understood as “southern Bay of Bengal” but with no spatial indication on the graph I may have mis

Response: Please note that in section 4.2 the description of the model outputs has been updated with the new model results. This paragraph has been deleted as we now focus on the aerosol Fe solubility.

**Comment 50:** I would personally have chosen Fig S7 to display on the ms instead of Fig 9. Indeed, Fig S7 as it shows the performance of each test-run to reproduce the observational data. Fig 9 is great but a little complex to interpret and to assess the model performance from.

Response: Former Figure S7 has been moved into the manuscript (current Figure 9) while former Figure 9 is now in the supporting information (current Figure S3).

**Comments 51-53 (see also comments 39-40 Referee 1):** (51) Different samples and leaching protocols and leaching solutions will also play a role in the differences highlighted here and above. 3 CFAs in this study already have different reactions to the same protocol, likely due to different mineralogy and different degree of combustion (this study has not addressed possible incomplete combustion from the sampled power plants). (52) Please see comment above, I believe many factors come into play and this conclusion cannot be drawn without acknowledging these

**parameters. (53) Here may also be a good time to mention other parameters that come into play apart from pH. Reminding the readers that all these studies are not strictly comparable to one another.**

Response: The reviewer comment has been implemented in the manuscript.

Page 12, line 443 has been updated as follows:

“This could be due to differences in the Fe speciation between CFA samples and/or the different leaching media used.”

**Comment 54: Is that the percentage increase or the final Fe solubility. Maybe the “from x%...to x%” is less prone to misunderstanding.**

Response: In this case, we are referring to the percentage increase in Fe solubility. The range of Fe solubilities is described in detail in the experiment results, section 3.1.

**Comment 55: Given in the main manuscript.**

Response: Page 12, lines 453-454 have been updated as follows:

“This may increase the surface negative charge favouring the absorption of  $H^+$  and thereby increase Fe dissolution at the particle surface”.

**Comment 56-57: Given in the main manuscript.**

Response: The reviewer comment has been implemented in the manuscript (Page 13, lines 472-473 and 486).

**Comment 58: Given in the main manuscript**

Response: Page 13, lines 491-492 have been updated as follows:

“The adsorption of anions can reduce oxalate adsorption on the particle surface due to electrostatic repulsion which results in slower release of Fe (Eick et al., 1999)”.

**Comment 59: Less soluble phases? I believe they are all chemically stable but show different reactivity toward the leaching media**

Response: Page 14, lines 507-508 have been updated as follows:

“As the dissolution continued, more refractory phases became the dominant source of dissolved Fe (Shi et al., 2011a).”.

**Comment 60 (see also Comments 44-45 of Referee 1): What is a pristine CFA? Aren't CFAs always the result of a combustion process (therefore, 'processed' particles)? Not sure about the wording used.**

Response: The term pristine CFA refers to the particles before undergoing atmospheric processing.

Page 14, lines 523-527 have been updated as follows:

“In order to investigate the links between Fe solubility and Fe speciation/mineralogy, more work is needed to determine the Fe mineralogy in CFA samples at the emission and after atmospheric processing, in combination with solubility experiments.”

**Comment 61: Given in the main manuscript.**

Response: Former Figures S8 and S9 have been merged as Figure 10.

**Comment 62: Given in the main manuscript.**

Response: In section 5.2, we discussed the results for the experiment conducted on the Libyan dust precursor, which is now specified in the text.

**Comment 63: Could you provide the solubility in “” please so the reader has an idea of the impact of each treatment?**

Response: The Fe solubility % for each treatment are provided in the following paragraph, lines 559-562, Page 15. Please note that the Fe speciation, the measurements of the Fe dissolution kinetics can be also downloaded at: <https://doi.org/10.25500/edata.bham.00000702>.

**Comment 64: Given in the main manuscript.**

Response: The reference “Bikkina et al. (2020)” was added (Page 15, line 576).

**Comment 65: This source wasn’t assessed in this study. Moreover, the sentence just above raises awareness on the need for more investigation on BB. The revised model has improved modelling of anthropogenic aeolian Fe dissolution.**

Response: This is true for the samples used in the dissolution experiments. However, the improvement of model-observation agreement supports the suppression of the oxalate-promoted dissolution found in this study. This was treated in Test 0, by assuming that the dissolution rate is independent from the pH for extremely acidic solutions ( $\text{pH} < 2$ ).

Page 15, lines 579-581 have been updated as follows:

"The revised model also enabled us to predict sensitivity to a more dynamic range of pH changes, particularly between anthropogenic combustion and biomass burning, by the suppression of the oxalate-promoted dissolution at pH lower than 2. In Test 0, the dissolution rate was assumed to be independent from the pH for extremely acidic solutions ( $\text{pH} < 2$ )”.

**Comment 66: Did improve yes but the Test 1 model run is still quite off for a range of datapoints**

Response: This is true, more work is needed to improve Fe emissions. Former Figure 10 has been moved to the supporting information (current Figure S5) and updated with the aerosol Fe solubility data .

Page 15, lines 583-586 have been updated as follows:

“In Fig. S5, the model estimates of aerosol Fe solubility over the Bay of Bengal considerably improved in Test 1 (RMSE 11) compared to Test 0 (RMSE 21), but more work is needed to improve size-resolved Fe emission, transport, and deposition”.

**Comments 67 and 71: (67) Anthropogenic? (71) Is that only the anthropogenic fraction of pyrogenic Fe? Maybe stick to CFA-Fe or anthropogenic-Fe if more accurate? I would suggest to change the caption to ‘Contribution of pyrogenic aerosols to the atmospheric dissolved Fe loading...’**

Response: We separated the contribution of anthropogenic combustion sources (ANTHRO) and biomass burning (BB) in Figure 11 and Figure 12, respectively.

Page 15, lines 586-588 have been updated as follows:

“The model results in Test 1 indicate a larger contribution of anthropogenic combustion sources to the atmospheric Fe loading over East Asia (Fig. 11), but a smaller contribution of biomass burning sources downwind from tropical regions (Fig. 12).”

The figure captions have been also updated as follows:

"Percentage contribution of anthropogenic combustion/biomass burning aerosols to the atmospheric dissolved Fe loading..."

**Comment 68: No short conclusion?**

Response: As the main findings were already summarised in the discussion part, we think that adding a conclusion would be a repetition of the discussion and of the abstract.

**Comment 69: BB could have been another colour (orange for example) for a better visual.**

Response: Former Figure 8 showing the dissolved Fe concentrations over the Bay of Bengal has been deleted as we now focus on the aerosol Fe solubility.

**Comment 70: Can the colour scale be improved in the dark blue and purple shades?**

Response: The reviewer comment has been implemented in current Figure S5.

**Comment 72: Maybe Figures 10 and 11 could go to SI as they are only very briefly discussed**

Response: Former Figure 10 has been update un moved to the supporting information (current Figure S5).

## Figures and Tables

Former Figures 7-11 and Figures S2-S10 have been rearranged following the suggestion of the reviewers. Former Figure 8 was deleted as we focus on the aerosol Fe solubility.

Additional Tables were provided in the supporting information according to the comments of the reviewers.

## List of new Tables: Tables S2, S4, S5

**Table S1: Percentages of ascorbate Fe (FeA), dithionite Fe (FeD), magnetite Fe (FeM), and total Fe (FeT) in the Arizona Test Dust (ATD, Power Technology, Inc.) to the total dust mass (wt%). For each type of extracted Fe, the standard deviation (sd) and number of replicates (n) is reported.**

| Fe species | wt%   | sd    | n |
|------------|-------|-------|---|
| FeA        | 0.057 | 0.002 | 7 |
| FeD        | 0.394 | 0.045 | 7 |
| FeM        | 0.047 | 0.006 | 7 |
| FeT        | 3.501 | 0.056 | 3 |

**Table S2: Modelled mass concentration of total Fe in PM<sub>2.5</sub> aerosol particles (ng m<sup>-3</sup>) over the Bay of Bengal from 27 December 2008 to 26 January 2009. Observations are reported in Bikkina et al. (2020). The concentrations of total Fe were calculated along the cruise tracks in the North Bay of Bengal (27 December 2008 - 10 January 2009) and the South Bay of Bengal (11-26 January 2009) using the IMPACT model. The total Fe emissions from anthropogenic combustion sources (ANTHRO) and biomass burning (BB) were estimated using the emission inventory of (Ito et al., 2018), whereas Fe emissions from mineral dust sources (DUST) were dynamically simulated (Ito et al., 2021a).**

| Date       | DUST | ANTHRO | BB  | Total Fe |
|------------|------|--------|-----|----------|
| 27/12/2008 | 20.7 | 11.1   | 0.2 | 31.9     |
| 28/12/2008 | 56.8 | 12.8   | 0.4 | 70.0     |
| 29/12/2008 | 71.2 | 10.7   | 0.4 | 82.4     |
| 30/12/2008 | 48.5 | 11.7   | 0.5 | 60.7     |
| 31/12/2008 | 55.3 | 17.1   | 0.6 | 73.0     |
| 01/01/2009 | 65.4 | 25.2   | 0.7 | 91.3     |
| 02/01/2009 | 69.2 | 33.5   | 0.7 | 103.4    |
| 03/01/2009 | 66.8 | 33.4   | 0.6 | 100.8    |
| 04/01/2009 | 48.0 | 19.1   | 0.5 | 67.7     |
| 05/01/2009 | 18.1 | 9.2    | 0.4 | 27.8     |
| 06/01/2009 | 6.5  | 7.0    | 0.3 | 13.9     |
| 07/01/2009 | 36.3 | 18.9   | 0.4 | 55.6     |
| 08/01/2009 | 31.1 | 14.9   | 0.4 | 46.4     |
| 09/01/2009 | 13.9 | 6.4    | 0.5 | 20.8     |
| 10/01/2009 | 3.4  | 27.9   | 1.9 | 33.2     |
| 11/01/2009 | 7.2  | 35.2   | 3.8 | 46.3     |
| 12/01/2009 | 5.6  | 21.4   | 3.5 | 30.5     |
| 13/01/2009 | 3.3  | 13.6   | 5.4 | 22.3     |
| 14/01/2009 | 3.3  | 15.0   | 7.0 | 25.2     |
| 15/01/2009 | 4.2  | 25.7   | 4.9 | 34.8     |
| 16/01/2009 | 4.6  | 24.3   | 6.1 | 35.0     |
| 17/01/2009 | 2.9  | 15.5   | 6.4 | 24.8     |
| 18/01/2009 | 2.0  | 9.5    | 4.7 | 16.1     |
| 19/01/2009 | 1.1  | 3.4    | 2.2 | 6.7      |
| 20/01/2009 | 1.0  | 4.3    | 3.9 | 9.2      |
| 21/01/2009 | 2.3  | 9.4    | 2.7 | 14.3     |
| 22/01/2009 | 2.5  | 8.7    | 2.1 | 13.2     |
| 23/01/2009 | 1.1  | 4.2    | 4.3 | 9.6      |
| 24/01/2009 | 0.7  | 2.4    | 5.0 | 8.1      |
| 25/01/2009 | 0.6  | 2.9    | 9.5 | 13.1     |
| 26/01/2009 | 0.4  | 2.5    | 8.2 | 11.2     |

**Table S3: Modelled Fe solubility in PM<sub>2.5</sub> aerosol particles (Fe%) over the Bay of Bengal from 27 December 2008 to 26 January 2009. Observations are reported in Bikkina et al. (2020). The aerosol Fe solubility were calculated along the cruise tracks in the North Bay of Bengal (27 December 2008 - 10 January 2009) and the South Bay of Bengal (11-26 January 2009) using the IMPACT model. In Test 0, we run the model without upgrades (Ito et al., 2021) and applying the proton-promoted, oxalate-promoted, and photoinduced dissolution schemes for combustion aerosols in Table S6 (Ito, 2015). The proton + oxalate dissolution scheme (Table 1) was applied in Test 1 and 3, while proton-promoted dissolution is used for Test 2. We adopted the base mineralogy for anthropogenic Fe emissions (Rathod et al., 2020) in Test 1 and 2. In Test 3, the Fe speciation of Krakow ash was used for all combustion sources.**

| Date       | Test 0 | Test 1 | Test 2 | Test 3 |
|------------|--------|--------|--------|--------|
| 27/12/2008 | 14.2   | 17.2   | 38.0   | 15.2   |
| 28/12/2008 | 8.8    | 11.1   | 21.7   | 10.6   |
| 29/12/2008 | 6.5    | 9.3    | 17.2   | 9.2    |
| 30/12/2008 | 7.5    | 12.5   | 25.1   | 13.2   |
| 31/12/2008 | 7.5    | 14.4   | 29.9   | 14.6   |
| 01/01/2009 | 8.7    | 16.2   | 33.2   | 16.3   |
| 02/01/2009 | 8.8    | 15.8   | 34.1   | 16.0   |
| 03/01/2009 | 8.8    | 16.5   | 37.9   | 16.0   |
| 04/01/2009 | 8.9    | 16.1   | 35.7   | 16.0   |
| 05/01/2009 | 14.0   | 18.2   | 40.4   | 19.2   |
| 06/01/2009 | 21.6   | 25.2   | 58.4   | 26.6   |
| 07/01/2009 | 12.1   | 17.7   | 39.6   | 17.2   |
| 08/01/2009 | 9.5    | 16.4   | 36.0   | 15.6   |
| 09/01/2009 | 10.5   | 15.9   | 33.4   | 16.3   |
| 10/01/2009 | 19.0   | 26.7   | 77.9   | 31.4   |
| 11/01/2009 | 12.8   | 24.2   | 74.2   | 29.3   |
| 12/01/2009 | 16.3   | 24.7   | 81.1   | 30.0   |
| 13/01/2009 | 25.2   | 24.0   | 82.8   | 30.9   |
| 14/01/2009 | 20.5   | 23.8   | 86.8   | 31.1   |
| 15/01/2009 | 12.8   | 24.4   | 89.8   | 30.0   |
| 16/01/2009 | 15.0   | 24.4   | 88.6   | 30.4   |
| 17/01/2009 | 22.8   | 26.3   | 90.7   | 33.2   |
| 18/01/2009 | 32.0   | 28.2   | 91.2   | 35.3   |
| 19/01/2009 | 47.9   | 28.8   | 88.7   | 35.3   |
| 20/01/2009 | 48.7   | 30.7   | 94.5   | 39.9   |
| 21/01/2009 | 36.5   | 35.7   | 88.6   | 42.0   |
| 22/01/2009 | 37.1   | 37.8   | 86.7   | 41.7   |
| 23/01/2009 | 60.9   | 37.5   | 95.3   | 46.8   |
| 24/01/2009 | 73.0   | 35.7   | 97.6   | 47.3   |
| 25/01/2009 | 66.8   | 32.7   | 98.8   | 46.0   |
| 26/01/2009 | 71.6   | 34.7   | 99.2   | 47.7   |

## List of new and updated Figures: Figures 5-12, S3, S5

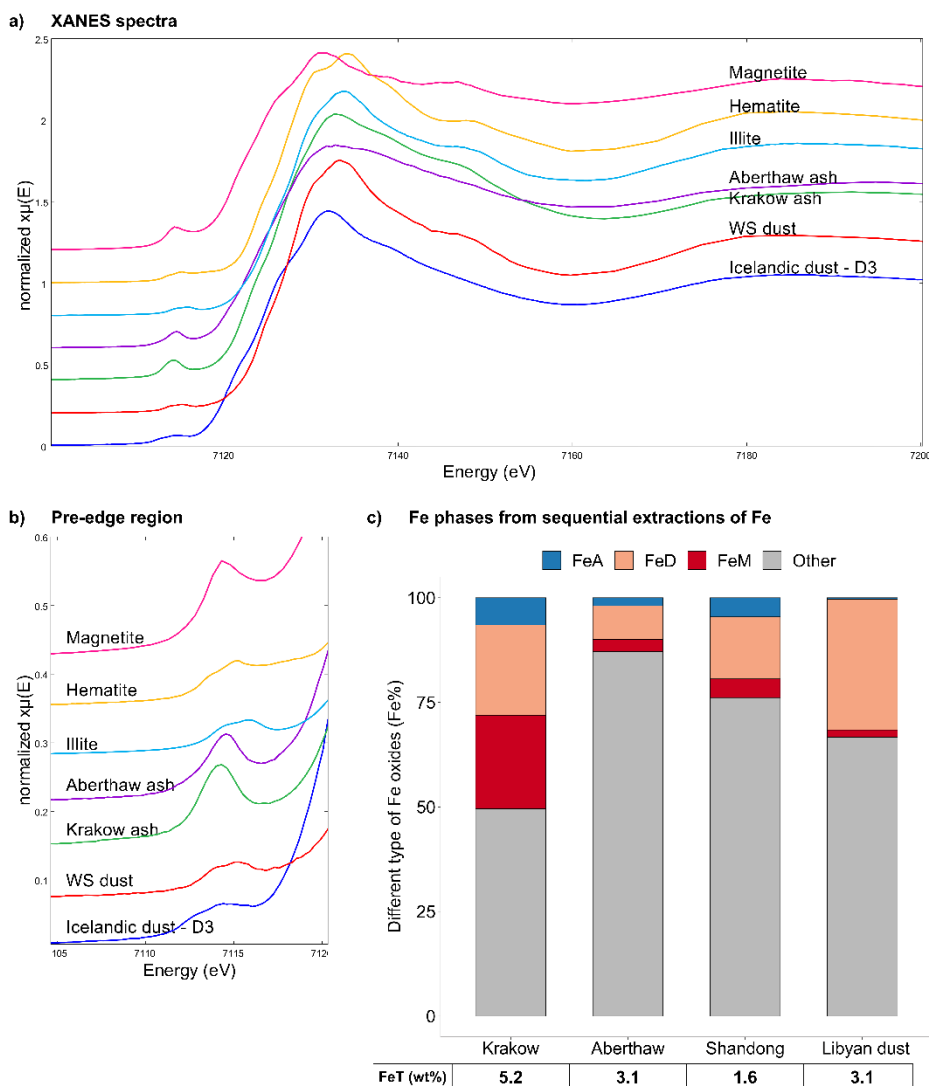

**Figure 2: Fe speciation in CFA and mineral dust samples. a-b) Fe K-edge XANES spectra of Krakow ash, Aberthaw ash, magnetite, hematite, and illite standards, mineral dust from the Dyngjúsundur dust hotspot in Iceland - D3 (Baldo et al., 2020), and mineral dust from western Sahara - WS dust (Shi et al., 2011b). c) Percentages of ascorbate Fe (amorphous Fe, FeA), dithionite Fe (goethite/hematite, FeD), magnetite Fe (FeM), and other Fe (including Fe in aluminosilicates) to the total Fe (FeT) in the CFA samples and Libyan dust precursor. The FeT (as %wt.) is given below each sample column. The data uncertainty was estimated using the error propagation formula: 4% for FeA/FeT, 11% for FeD/FeT, 12% for FeM/FeT, and 2% for FeT.**



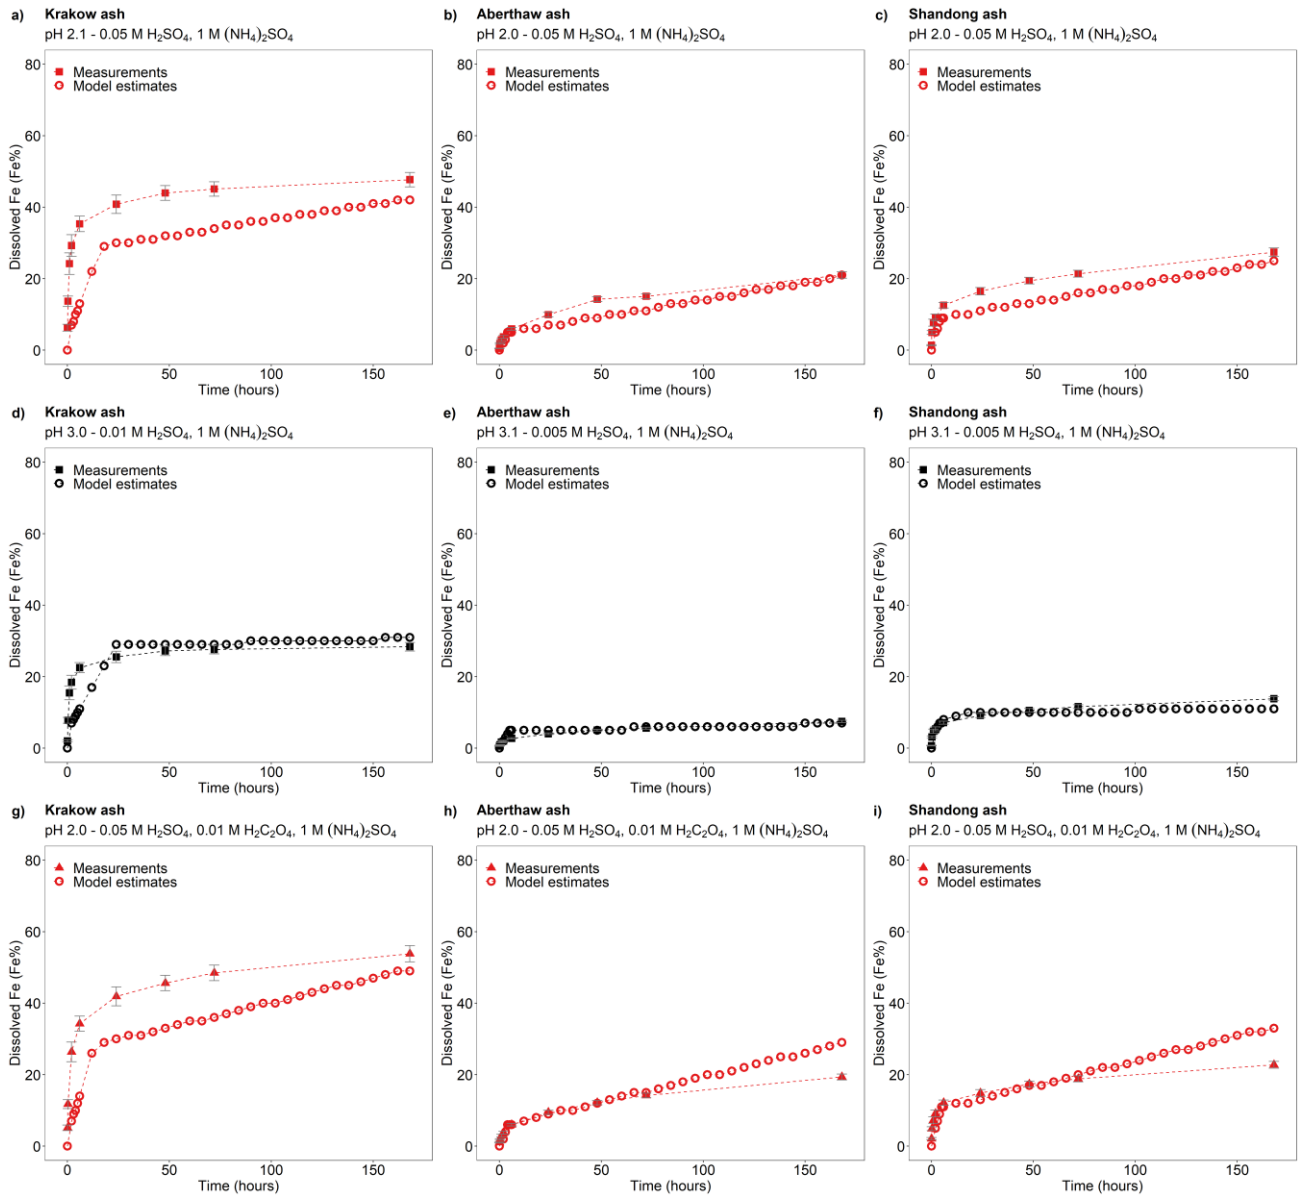

**Figure 3:** Comparison between the Fe dissolution kinetics of Krakow, Aberthaw, and Shandong ashes predicted using Eq. (1) and measured in a-c) H<sub>2</sub>SO<sub>4</sub> solutions at around pH 2 with 1 M (NH<sub>4</sub>)<sub>2</sub>SO<sub>4</sub> (Experiments 2 at around pH 2 in Table S1), d-f) H<sub>2</sub>SO<sub>4</sub> solutions at around pH 3 with 1 M (NH<sub>4</sub>)<sub>2</sub>SO<sub>4</sub> (Experiments 2 at around pH 3 in Table S1), g-i) H<sub>2</sub>SO<sub>4</sub> solutions at pH 2.0 with 0.01 M H<sub>2</sub>C<sub>2</sub>O<sub>4</sub> and 1 M (NH<sub>4</sub>)<sub>2</sub>SO<sub>4</sub> (Experiments 3 at pH 2.0 in Table S1). The molar concentrations of H<sub>2</sub>SO<sub>4</sub>, H<sub>2</sub>C<sub>2</sub>O<sub>4</sub> and (NH<sub>4</sub>)<sub>2</sub>SO<sub>4</sub> in the experiment solutions are shown. The final pH of the experiment solutions is also reported, which was calculated using the E-AIM model III for aqueous solution (Wexler and Clegg, 2002) accounting for the buffer capacity of the CFA samples.

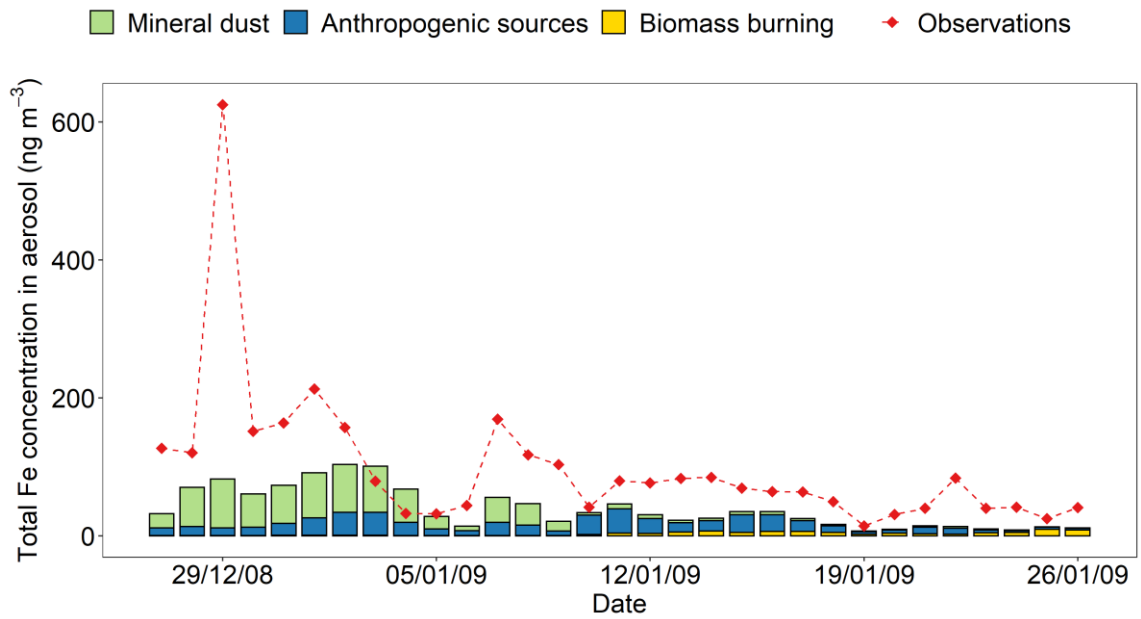

**Figure 4: Mass concentration of total Fe in PM<sub>2.5</sub> aerosol particles over the Bay of Bengal from 27 December 2008 to 26 January 2009. Observations are from Bikkina et al. (2020) (red filled diamonds). The concentrations of total Fe were calculated along the cruise tracks in the North Bay of Bengal (27 December 2008 - 10 January 2009) and the South Bay of Bengal (11-26 January 2009) using the IMPACT model. The total Fe emissions from anthropogenic combustion sources (ANTHRO) and biomass burning (BB) were estimated using the emission inventory of (Ito et al., 2018), whereas Fe emissions from mineral dust sources (DUST) were dynamically simulated (Ito et al., 2021a).**

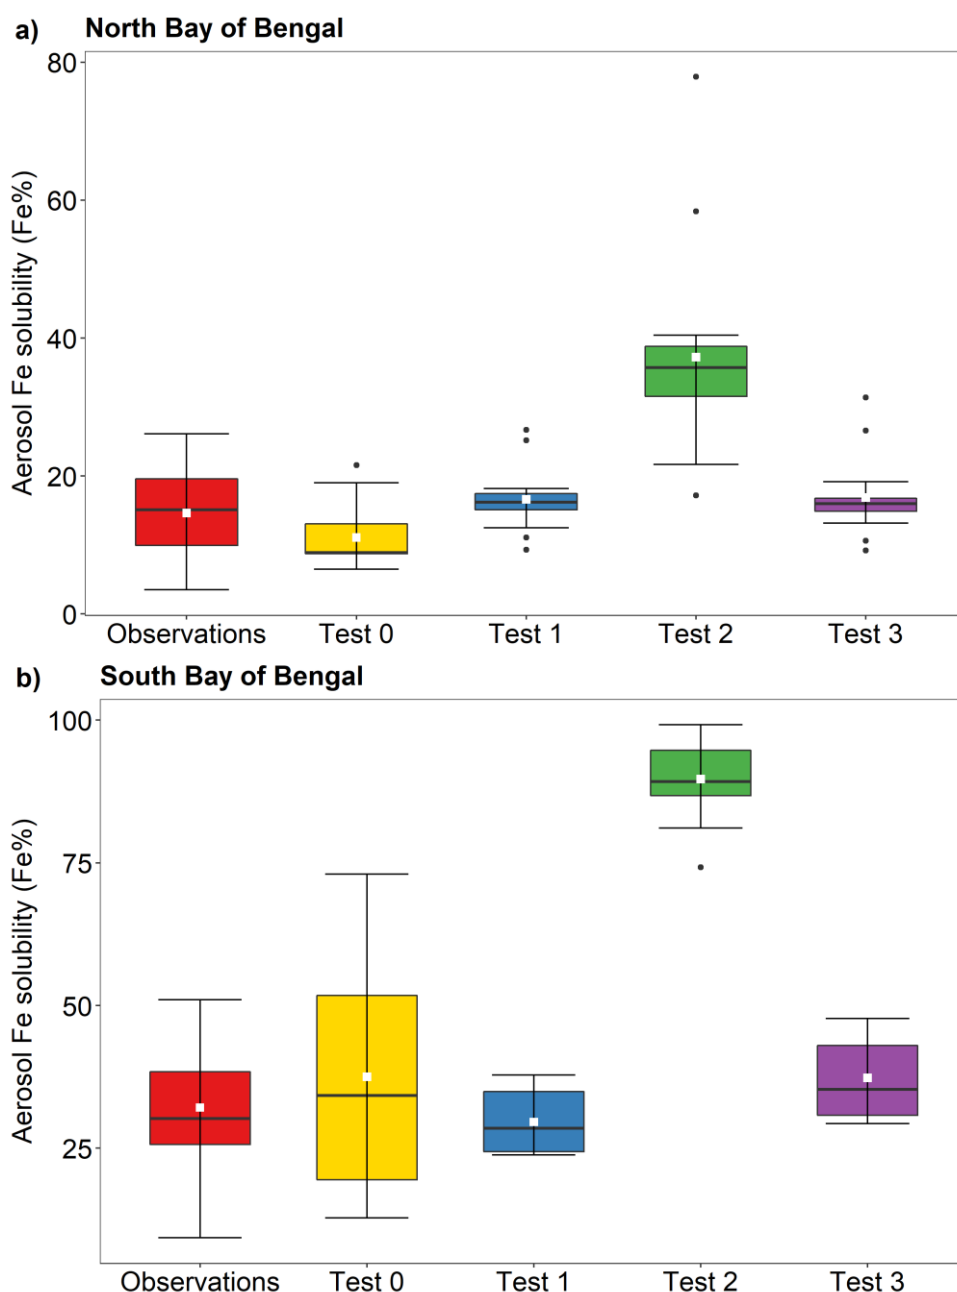

**Figure 5:** Fe solubility in PM<sub>2.5</sub> aerosol particles over a) the North Bay of Bengal, and b) the South Bay of Bengal from 27 December 2008 to 26 January 2009. Observations are from Bikkina et al. (2020). Model estimates of Test 0, Test 1, Test 2, and Test 3 were calculated along the cruise tracks using the IMPACT model. In Test 0, we run the model without upgrades (Ito et al., 2021a) and applying the proton-promoted, oxalate-promoted, and photoinduced dissolution schemes for combustion aerosols in Table S6 (Ito, 2015). The proton + oxalate dissolution scheme (Table 1) was applied in Test 1 and 3, while proton-promoted dissolution is used for Test 2. We adopted the base mineralogy for anthropogenic Fe emissions (Rathod et al., 2020) in Test 1 and 2. In Test 3, the Fe speciation of Krakow ash was used for all combustion sources. The small white square within the box shows the mean. The solid line within the box indicates the median. The lower and upper hinges correspond to the 25<sup>th</sup> and 75<sup>th</sup> percentiles. The whiskers above and below the box indicate the  $1.5 \times$  interquartile range, and the data outside this range are plotted individually.

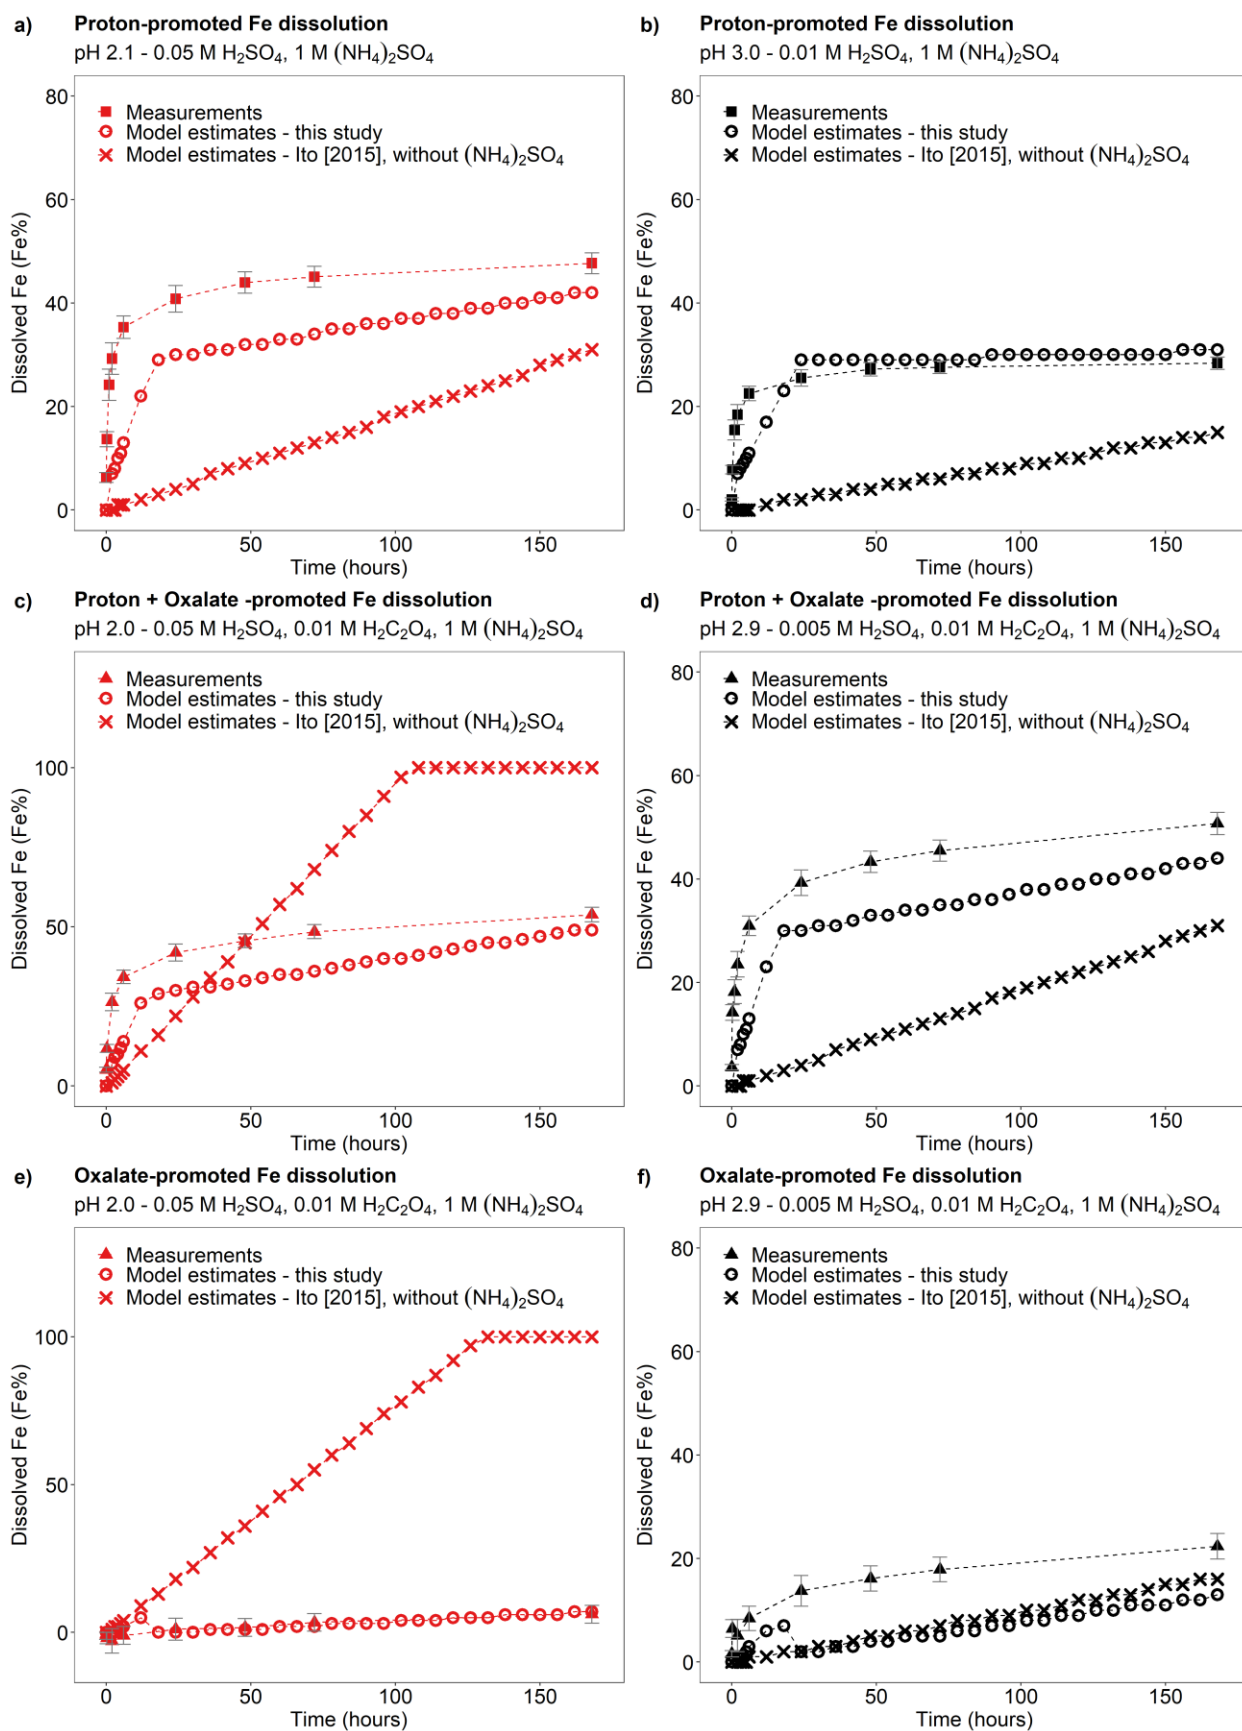

**Figure 6: Comparison between the Fe dissolution kinetics of Krakow ash calculated using the original (Ito, 2015) and the new dissolution scheme (Tables 1 and S6). a-b) Proton-promoted Fe dissolution in H<sub>2</sub>SO<sub>4</sub> solutions with 1 M (NH<sub>4</sub>)<sub>2</sub>SO<sub>4</sub> at pH 2.1 (a), and at pH 3.0 (b) (Experiment 2 at pH 2.1, and Experiment 2 at pH 3.0 in Table S1). c-d) Proton + oxalate promoted Fe dissolution in H<sub>2</sub>SO<sub>4</sub> solutions with 0.01 M H<sub>2</sub>C<sub>2</sub>O<sub>4</sub> and 1 M (NH<sub>4</sub>)<sub>2</sub>SO<sub>4</sub> at pH 2.0 (c), and**

at pH 2.9 (d) (Experiment 3 at pH 2.0, and Experiment 3 at pH 2.9 in Table S1). The Fe dissolution kinetics were predicted using the rate constants in Table 1 calculated in this study (open circles) and the dissolution scheme for combustion aerosols in Ito (2015) (cross marks). Note that the dissolution scheme in Ito (2015) was calculated based on laboratory measurements conducted at low ionic strength. e-f) Contribution of the oxalate-promoted dissolution to dissolved Fe estimated using Eq. (3). The molar concentrations of  $\text{H}_2\text{SO}_4$ ,  $\text{H}_2\text{C}_2\text{O}_4$  and  $(\text{NH}_4)_2\text{SO}_4$  in the experiment solutions are shown. The final pH of the experiment solutions is also reported, which was calculated using the E-AIM model III for aqueous solution (Wexler and Clegg, 2002) accounting for the buffer capacity of the CFA samples

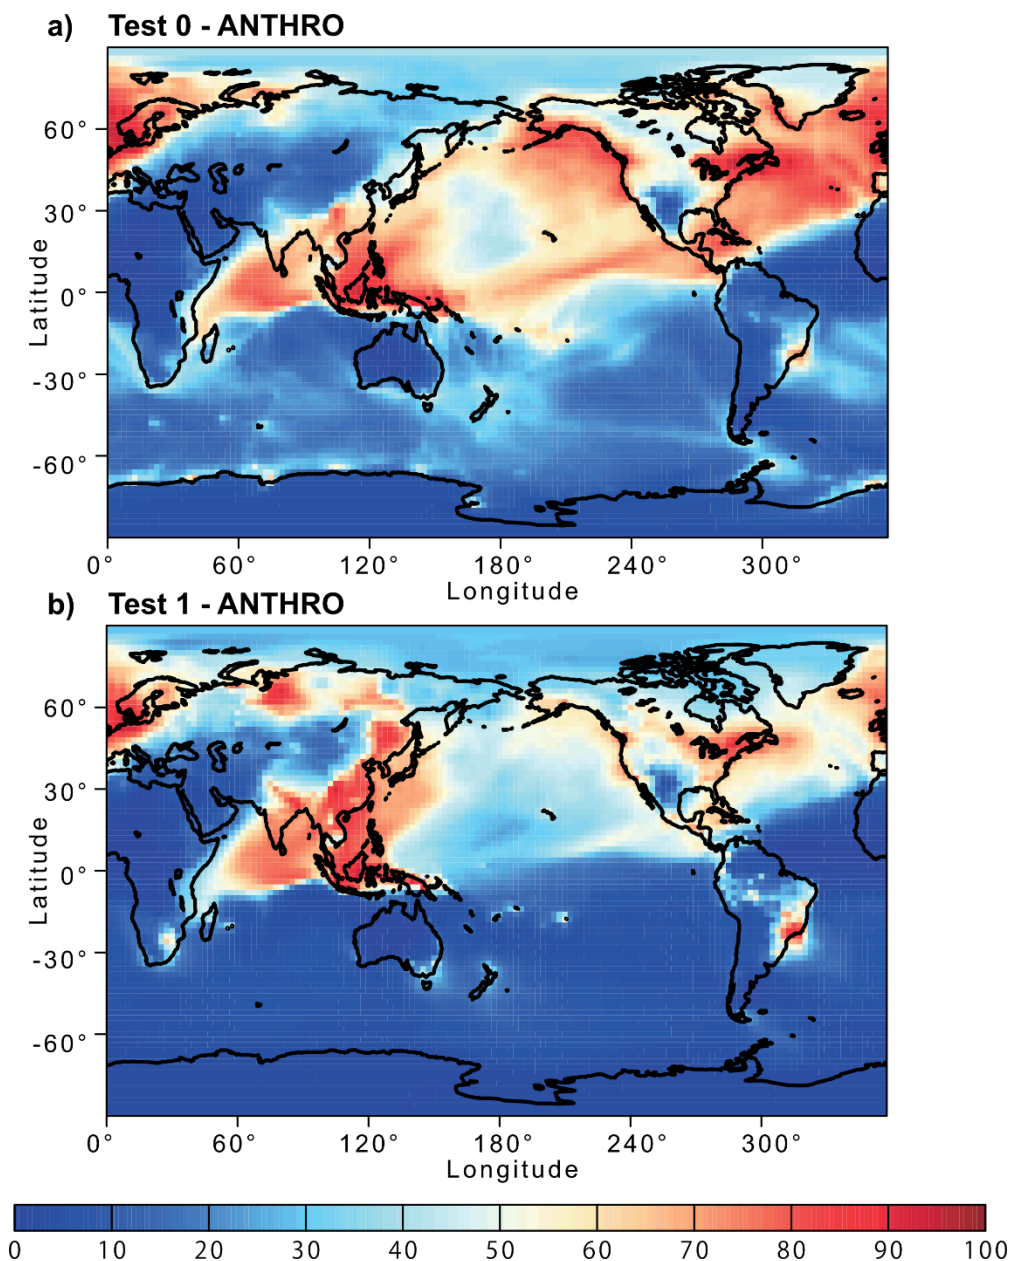

**Figure 7:** Percentage contribution of anthropogenic combustion (ANTHRO) aerosol to the atmospheric dissolved Fe concentration near the ground surface from a) Test 0 and b) Test 1 for December 2008 and January 2009. In Test 0, we ran the model without upgrades in the Fe dissolution scheme (Ito et al., 2021a) and applying the proton-promoted, oxalate-promoted and photoinduced dissolution schemes for combustion aerosols in Table S6 (Ito, 2015). The proton + oxalate dissolution scheme (Table 1) was applied in Test 1 and we adopted the base mineralogy for anthropogenic Fe emissions (Rathod et al., 2020).

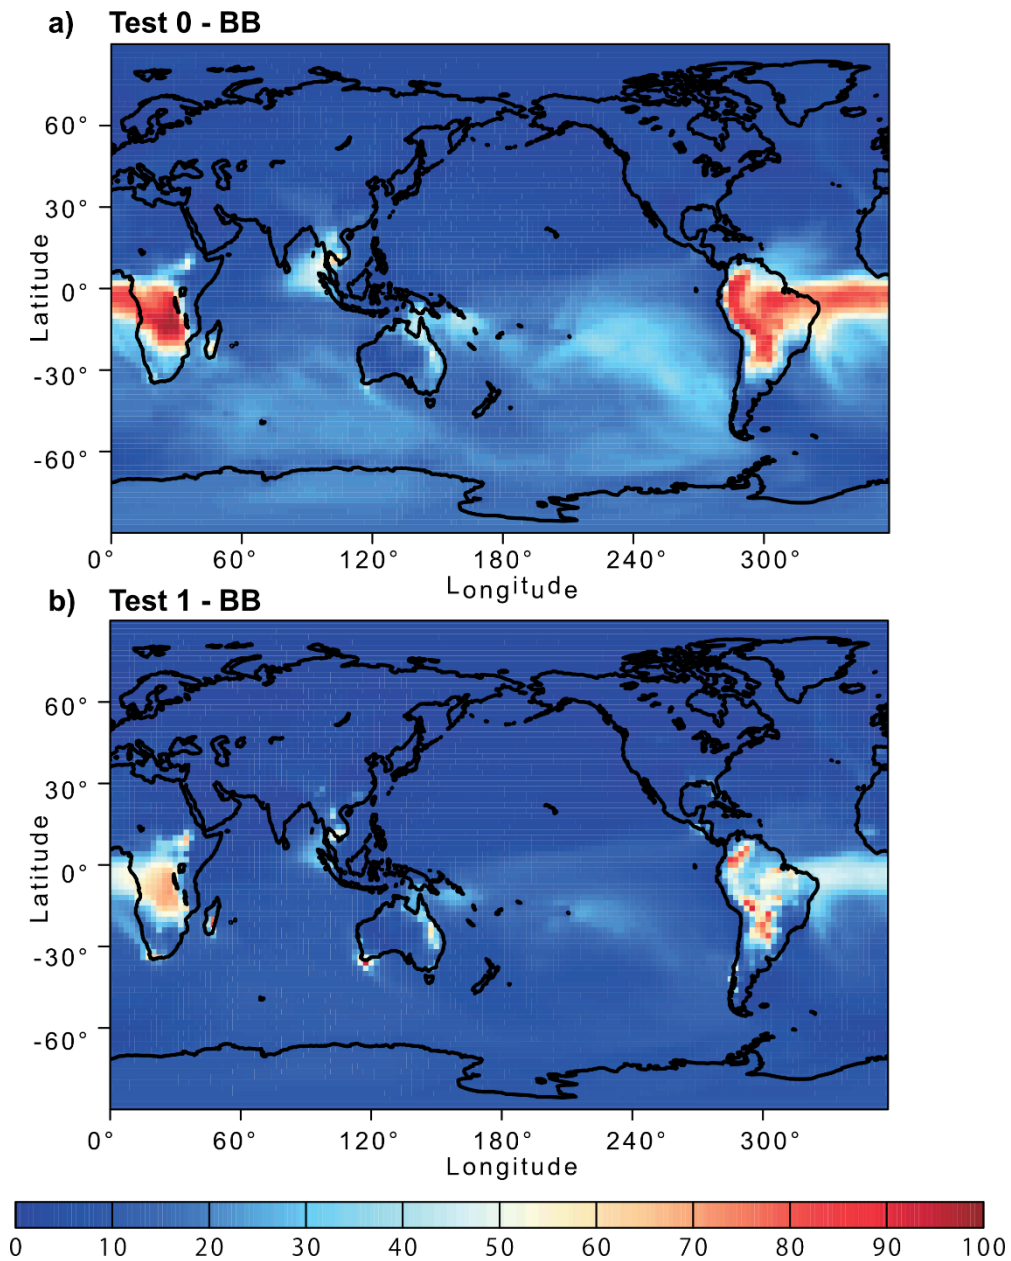

**Figure 8:** Percentage contribution of biomass burning (BB) aerosol to the atmospheric dissolved Fe concentration near the ground surface from a) Test 0 and b) Test 1 for December 2008 and January 2009. In Test 0, we ran the model without upgrades in the Fe dissolution scheme (Ito et al., 2021a) and applying the proton-promoted, oxalate-promoted and photoinduced dissolution schemes for combustion aerosols in Table S6 (Ito, 2015). The proton + oxalate dissolution scheme (Table 1) was applied in Test 1 and we adopted the base mineralogy for anthropogenic Fe emissions (Rathod et al., 2020).

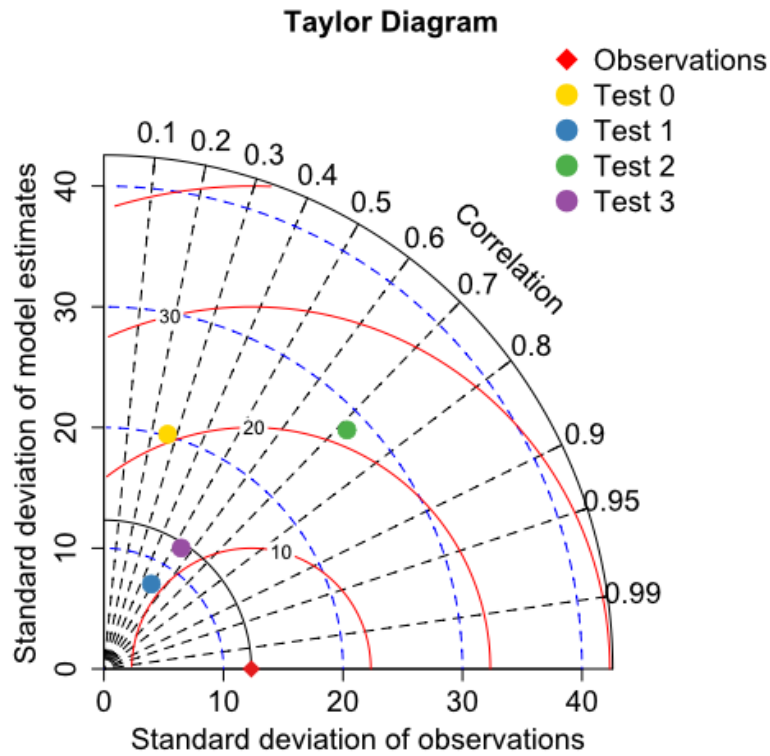

**Figure S3: Comparison between observations and model estimates of Fe solubility in  $PM_{2.5}$  aerosol particles over the Bay of Bengal from 27 December 2008 to 26 January 2009. Observations are from Bikkina et al. (2020). Model estimates of Test 0, Test 1, Test 2, and Test 3 were calculated along the cruise tracks using the IMPACT model. The Taylor diagram summarizes the statistics for the comparison between observations of aerosol Fe solubility and the different simulations (Test 0-3). The dashed curves in blue indicate the standard deviation values. The curves in red denote the root-mean-squared difference between the observational data and the model predictions (RMSE). The dashed lines in black represent the correlation coefficients.**

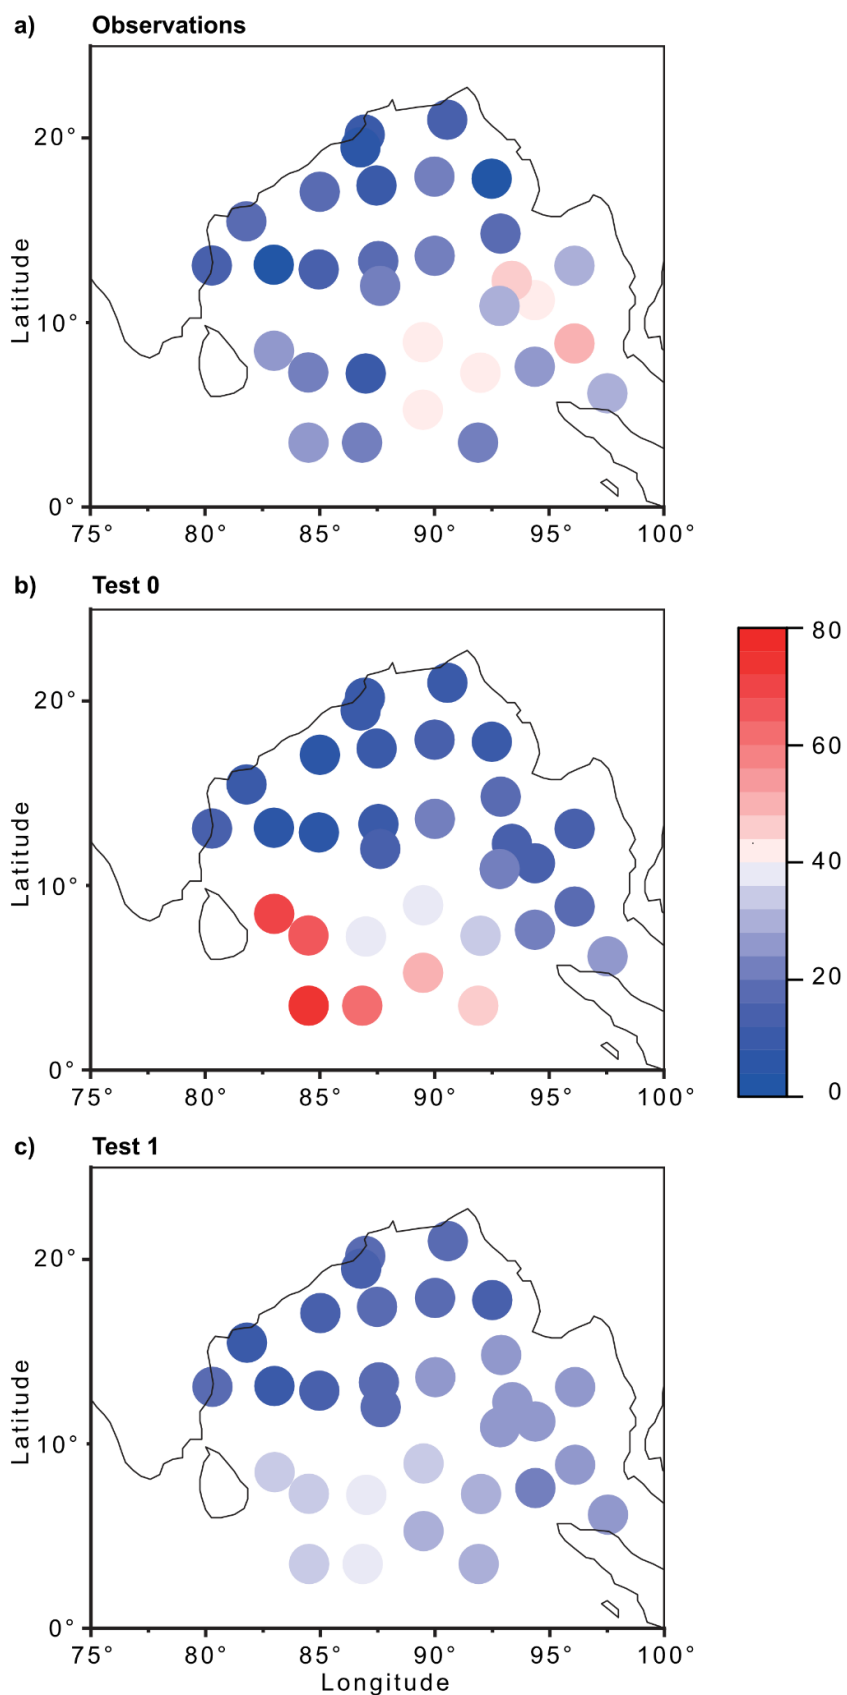

**Figure S5: Fe solubility in PM<sub>2.5</sub> aerosol particles over the Bay of Bengal from 27 December 2008 to 26 January 2009. a) Observations from Bikkina et al. (2020). b-c) Model estimates of Test 0 and Test 1 calculated along the cruise tracks using the IMPACT model. In Test 0, we ran the model without upgrades in the Fe dissolution scheme (Ito et al., 2021a) and applying the proton-promoted, oxalate-promoted and photoinduced dissolution schemes for combustion aerosols in Table S6 (Ito, 2015). The proton + oxalate dissolution scheme (Table 1) was applied in Test 1 and we adopted the base mineralogy for anthropogenic Fe emissions (Rathod et al., 2020).**



## References

- Baker, A. R., Li, M., and Chance, R.: Trace Metal Fractional Solubility in Size-Segregated Aerosols From the Tropical Eastern Atlantic Ocean, *Global Biogeochem.*, 34, e2019GB006510, doi: 10.1029/2019GB006510, 2020.
- Baker, A. R., Kanakidou, M., Nenes, A., Myriokefalitakis, S., Croot, P. L., Duce, R. A., Gao, Y., Guieu, C., Ito, A., Jickells, T. D., Mahowald, N. M., Middag, R., Perron, M. M. G., Sarin, M. M., Shelley, R., and Turner, D. R.: Changing atmospheric acidity as a modulator of nutrient deposition and ocean biogeochemistry, *Sci. Adv.*, 7, eabd8800, doi: 10.1126/sciadv.abd8800, 2021.
- Baldo, C., Formenti, P., Nowak, S., Chevaillier, S., Cazaunau, M., Panguì, E., Di Biagio, C., Doussin, J. F., Ignatyev, K., Dagsson-Waldhauserova, P., Arnalds, O., MacKenzie, A. R., and Shi, Z.: Distinct chemical and mineralogical composition of Icelandic dust compared to northern African and Asian dust, *Atmos. Chem. Phys.*, 20, 13521-13539, doi: 10.5194/acp-20-13521-2020, 2020.
- Bikkina, S., Kawamura, K., Sarin, M., and Tachibana, E.: <sup>13</sup>C Probing of Ambient Photo-Fenton Reactions Involving Iron and Oxalic Acid: Implications for Oceanic Biogeochemistry, *ACS Earth Space Chem.*, 4, 964-976, doi: 10.1021/acsearthspacechem.0c00063, 2020.
- Bonneville, S., Behrends, T., and Van Cappellen, P.: Solubility and dissimilatory reduction kinetics of iron(III) oxyhydroxides: A linear free energy relationship, *Geochim. Cosmochim. Ac.*, 73, 5273-5282, doi: <https://doi.org/10.1016/j.gca.2009.06.006>, 2009.
- Borgatta, J., Paskavitz, A., Kim, D., and Navea, J. G.: Comparative evaluation of iron leach from different sources of fly ash under atmospherically relevant conditions, *Environ. Chem.*, 13, 902-912, doi: 10.1071/en16046, 2016.
- Brown, P., Jones, T., and Bérubé, K.: The internal microstructure and fibrous mineralogy of fly ash from coal-burning power stations, *Environ. Pollut.*, 159, 3324-3333, doi: 10.1016/j.envpol.2011.08.041, 2011.
- Chen, H., Laskin, A., Baltrusaitis, J., Gorski, C. A., Scherer, M. M., and Grassian, V. H.: Coal fly ash as a source of iron in atmospheric dust, *Environ. Sci. Technol.*, 46, 2112-2120, doi: 10.1021/es204102f, 2012.
- Chen, H. H., and Grassian, V. H.: Iron Dissolution of Dust Source Materials during Simulated Acidic Processing: The Effect of Sulfuric, Acetic, and Oxalic Acids, *Environ. Sci. Technol.*, 47, 10312-10321, doi: 10.1021/es401285s, 2013.
- Cornell, R. M., Posner, A. M., and Quirk, J. P.: Kinetics and mechanisms of the acid dissolution of goethite ( $\alpha$ -FeOOH), *Journal of Inorganic and Nuclear Chemistry*, 38, 563-567, doi: 10.1016/0022-1902(76)80305-3, 1976.
- Cwiertny, D. M., Baltrusaitis, J., Hunter, G. J., Laskin, A., Scherer, M. M., and Grassian, V. H.: Characterization and acid-mobilization study of iron-containing mineral dust source materials, *J. Geophys. Res.-Atmos.*, 113, D05202, doi: 10.1029/2007jd009332, 2008.
- Eick, M. J., Peak, J. D., and Brady, W. D.: The Effect of Oxyanions on the Oxalate-Promoted Dissolution of Goethite, *SSSAJ*, 63, 1133-1141, doi: doi.org/10.2136/sssaj1999.6351133x, 1999.
- Fu, H., Cwiertny, D. M., Carmichael, G. R., Scherer, M. M., and Grassian, V. H.: Photoreductive dissolution of Fe-containing mineral dust particles in acidic media, *Journal of Geophysical Research*, 115, D11304, doi: 10.1029/2009jd012702, 2010.
- Fu, H. B., Lin, J., Shang, G. F., Dong, W. B., Grassian, V. H., Carmichael, G. R., Li, Y., and Chen, J. M.: Solubility of Iron from Combustion Source Particles in Acidic Media Linked to Iron Speciation, *Environ. Sci. Technol.*, 46, 11119-11127, doi: 10.1021/es302558m, 2012.

Ito, A.: Atmospheric Processing of Combustion Aerosols as a Source of Bioavailable Iron, *Environ. Sci. Technol. Lett.*, 2, 70-75, doi: 10.1021/acs.estlett.5b00007, 2015.

Ito, A., and Shi, Z.: Delivery of anthropogenic bioavailable iron from mineral dust and combustion aerosols to the ocean, *Atmos. Chem. Phys.*, 16, 85-99, doi: 10.5194/acp-16-85-2016, 2016.

Ito, A., Lin, G. X., and Penner, J. E.: Radiative forcing by light-absorbing aerosols of pyrogenetic iron oxides, *Sci. Rep.*, 8, 7347, doi: 10.1038/s41598-018-25756-3, 2018.

Ito, A., Adebisi, A. A., Huang, Y., and Kok, J. F.: Less atmospheric radiative heating by dust due to the synergy of coarser size and aspherical shape, *Atmos. Chem. Phys.*, 21, 16869–16891, doi: 10.5194/acp-21-16869-2021, 2021a.

Ito, A., Ye, Y., Baldo, C., and Shi, Z.: Ocean fertilization by pyrogenic aerosol iron, *npj Clim. Atmos. Sci.*, 4, 30, doi: 10.1038/s41612-021-00185-8, 2021b.

Jones, D. R.: The Leaching of Major and Trace Elements from Coal Ash, in: *Environmental Aspects of Trace Elements in Coal*, edited by: Swaine, D. J., and Goodarzi, F., Springer Netherlands, Dordrecht, 221-262, 1995.

Kim, D., Xiao, Y., Karchere-Sun, R., Richmond, E., Ricker, H. M., Leonardi, A., and Navea, J. G.: Atmospheric Processing of Anthropogenic Combustion Particles: Effects of Acid Media and Solar Flux on the Iron Mobility from Fly Ash, *ACS Earth Space Chem.*, 4, 750-761, doi: 10.1021/acsearthspacechem.0c00057, 2020.

Meskhidze, N., Chameides, W. L., Nenes, A., and Chen, G.: Iron mobilization in mineral dust: Can anthropogenic SO<sub>2</sub> emissions affect ocean productivity?, *Geophys. Res. Lett.*, 30, 2085, doi: 10.1029/2003gl018035, 2003.

Rathod, S. D., Hamilton, D. S., Mahowald, N. M., Klimont, Z., Corbett, J. J., and Bond, T. C.: A Mineralogy-Based Anthropogenic Combustion-Iron Emission Inventory, *J. Geophys. Res.-Atmos.*, 125, e2019JD032114, doi: 10.1029/2019jd032114, 2020.

Shelley, R. U., Landing, W. M., Ussher, S. J., Planquette, H., and Sarthou, G.: Regional trends in the fractional solubility of Fe and other metals from North Atlantic aerosols (GEOTRACES cruises GA01 and GA03) following a two-stage leach, *Biogeosciences*, 15, 2271-2288, doi: 10.5194/bg-15-2271-2018, 2018.

Shi, Z., Bonneville, S., Krom, M. D., Carslaw, K. S., Jickells, T. D., Baker, A. R., and Benning, L. G.: Iron dissolution kinetics of mineral dust at low pH during simulated atmospheric processing, *Atmos. Chem. Phys.*, 11, 995-1007, doi: 10.5194/acp-11-995-2011, 2011a.

Shi, Z., Krom, M. D., Bonneville, S., Baker, A. R., Bristow, C., Drake, N., Mann, G., Carslaw, K., McQuaid, J. B., Jickells, T., and Benning, L. G.: Influence of chemical weathering and aging of iron oxides on the potential iron solubility of Saharan dust during simulated atmospheric processing, *Global Biogeochem.*, 25, GB2010, doi: 10.1029/2010gb003837, 2011b.

Shi, Z., Krom, M. D., Bonneville, S., and Benning, L. G.: Atmospheric processing outside clouds increases soluble iron in mineral dust, *Environ. Sci. Technol.*, 49, 1472-1477, doi: 10.1021/es504623x, 2015.

Shi, Z. B., Woodhouse, M. T., Carslaw, K. S., Krom, M. D., Mann, G. W., Baker, A. R., Savov, I., Fones, G. R., Brooks, B., Drake, N., Jickells, T. D., and Benning, L. G.: Minor effect of physical size sorting on iron solubility of transported mineral dust, *Atmos. Chem. Phys.*, 11, 8459-8469, doi: 10.5194/acp-11-8459-2011, 2011c.

Sholkovitz, E. R., Sedwick, P. N., and Church, T. M.: Influence of anthropogenic combustion emissions on the deposition of soluble aerosol iron to the ocean: Empirical estimates for island sites in the North Atlantic, *Geochim. Cosmochim. Ac.*, 73, 3981-4003, doi: 10.1016/j.gca.2009.04.029, 2009.

Sholkovitz, E. R., Sedwick, P. N., Church, T. M., Baker, A. R., and Powell, C. F.: Fractional solubility of aerosol iron: Synthesis of a global-scale data set, *Geochim. Cosmochim. Ac.*, 89, 173-189, doi: 10.1016/j.gca.2012.04.022, 2012.

Spokes, L. J., and Jickells, T. D.: Factors controlling the solubility of aerosol trace metals in the atmosphere and on mixing into seawater, *Aquat. Geochem.*, 1, 355-374, doi: 10.1007/BF00702739, 1995.

Srinivas, B., Sarin, M. M., and Kumar, A.: Impact of anthropogenic sources on aerosol iron solubility over the Bay of Bengal and the Arabian Sea, *Biogeochemistry*, 110, 257-268, doi: 10.1007/s10533-011-9680-1, 2012.

Wang, R., Balkanski, Y., Boucher, O., Bopp, L., Chappell, A., Ciais, P., Hauglustaine, D., Penueles, J., and Tao, S.: Sources, transport and deposition of iron in the global atmosphere, *Atmos. Chem. Phys.*, 15, 6247-6270, doi: 10.5194/acp-15-6247-2015, 2015.

Wexler, A. S., and Clegg, S. L.: Atmospheric aerosol models for systems including the ions  $H^+$ ,  $NH_4^+$ ,  $Na^+$ ,  $SO_4^{2-}$ ,  $NO_3^-$ ,  $Cl^-$ ,  $Br^-$ , and  $H_2O$ , *J. Geophys. Res.-Atmos*, 107, 4207, doi: 10.1029/2001JD000451, 2002.

Zhu, X. R., Prospero, J. M., Millero, F. J., Savoie, D. L., and Brass, G. W.: The solubility of ferric ion in marine mineral aerosol solutions at ambient relative humidities *Mar. Chem.*, 38, 91-107, doi: 10.1016/0304-4203(92)90069-m, 1992.
